# Supplementary material for: The effect of mutation on an aggregation-prone protein: An in vivo, in vitro, and in silico analysis
Source: PubMed Central journal article supplement (PMC9295795; doi:10.1073/pnas.2200468119), 2022-05-25
Supplement: pnas.2200468119.sapp.pdf [file pnas.2200468119.sapp.pdf]

1 **SUPPLEMENTARY APPENDIX**

2  
3 **The effect of mutation on an aggregation-prone protein: An *in vivo*, *in vitro* and *in silico***  
4 **analysis**

5  
6 **N. Guthertz<sup>1</sup>, R. van der Kant<sup>2,3</sup>, R. M. Martinez<sup>1</sup>, Y. Xu<sup>1</sup>, C. Trinh<sup>1</sup>, B. I. Iorga<sup>4</sup>, F.**  
7 **Rousseau<sup>2,3</sup>, J. Schymkowitz<sup>2,3</sup>, D. J. Brockwell<sup>1</sup>, S. E. Radford<sup>1,\*</sup>**

8  
9 <sup>1</sup> *Astbury Centre for Structural Molecular Biology, School of Molecular & Cellular Biology, Faculty of*  
10 *Biological Sciences, University of Leeds, Leeds, LS2 9JT, UK.*

11 <sup>2</sup> *Switch Laboratory, VIB-KU Leuven Center for Brain & Disease Research, Herestraat 49, 3000 Leuven,*  
12 *Belgium*

13 <sup>3</sup> *Department of Cellular and Molecular Medicine, KU Leuven, Herestraat 49, Box 802, 3000 Leuven,*  
14 *Belgium*

15 <sup>4</sup> *Université Paris-Saclay, CNRS UPR 2301, Institut de Chimie des Substances Naturelles, 91198 Gif-sur-*  
16 *Yvette, France*

17  
18 \* Corresponding author. Email: S.E.Radford@leeds.ac.uk (S. E. R.)

## 20 MATERIALS AND METHODS

### 22 The TPBLA assay

23 MCD<sub>GROWTH</sub> (maximal cell dilution allowing growth) assays were performed in sterile 48-well LB agar  
24 plates (Greiner Bio-One, cat. 677102) prepared prior to the assay. Tetracycline (10 µg mL<sup>-1</sup> final  
25 concentration) and filter-sterilised L-arabinose (final concentration of 0.075 % (w/v)) were added to  
26 100 mL of sterile 1.5 % (w/v) LB agar cooled to < 50 °C. This solution (300 µL) was added into each of  
27 the first six wells (first row) of the 48-well plates. Ampicillin (10 mg mL<sup>-1</sup> stock) was then added to the LB  
28 agar stock to give the required concentration for the next row of wells. This procedure was repeated until  
29 the plate contained 8 rows of LB agar containing increasing concentrations of ampicillin. β-lactamase-test  
30 protein constructs were screened over an ampicillin concentration range of either 0–140 µg mL<sup>-1</sup> (20 µg  
31 mL<sup>-1</sup> increments, for the three series (D53X-, D76X- and D98X-β<sub>2</sub>m) and rabbit β<sub>2</sub>m) or 0–280 µg mL<sup>-1</sup>  
32 (40 µg mL<sup>-1</sup> increments, for D76N+X variants, where X can be 1 to 5 mutations). Note that the A.U.C.  
33 value depends on the range of ampicillin concentration used and hence A.U.C. values obtained in  
34 experiments using different antibiotic range cannot be directly compared. Agar plates were left to set in a  
35 sterile environment.

36  
37 A strip of colonies of fresh *E. coli* SCS1 cells (Stratagene) transformed with the appropriate plasmid  
38 was used to inoculate 100 mL sterile LB containing 10 µg mL<sup>-1</sup> tetracycline. Cultures were incubated  
39 overnight at 37°C with shaking (200 rotation per min (rpm)). One millilitre of overnight culture was used  
40 to inoculate 100 mL sterile LB containing 10 µg mL<sup>-1</sup> tetracycline and grown at 37°C with shaking  
41 (200 rpm) until an OD<sub>600</sub> of 0.6 was reached. Expression of the β-lactamase fusion construct was induced  
42 by the addition of filter-sterilised arabinose at a final concentration of 0.075 % (w/v). Cultures were  
43 incubated for a further 1 h then serially diluted 10-fold into sterile 170 mM NaCl solution. Three  
44 microlitres of each dilution was then spotted onto the pre-prepared 48-well agar plates. The plates were  
45 incubated at 37°C for 18 h and the MCD<sub>GROWTH</sub> was determined for each ampicillin concentration by  
46 visual inspection. The area under the MCD<sub>GROWTH</sub> curve was then integrated to obtain a single value, the  
47 *in vivo* growth score (A.U.C.). This value was used to easily compare different variants in the TPBLA. At  
48 least 3 biological replicates were performed. The r values were calculated using Prism 8 (version 8.2.1),  
49 using the rank-based Spearman correlations.

### 51 Molecular biology

52 All the single point mutants for the D53X-, D76X- and D98X-β<sub>2</sub>m series and the D76N-X-β<sub>2</sub>m variants  
53 (for the TPBLA assay or for protein expression and purification) was cloned using the Q5® Site-Directed  
54 Mutagenesis Kit (New England BioLab). Rabbit-β<sub>2</sub>m was ordered from Twist Bioscience and cloned into  
55 the pINK plasmid using NdeI and HindIII restriction (high fidelity) sites (New England BioLab).

## 57 **Protein expression and purification**

58 All proteins (D76X- $\beta_2$ m series, D76N-X- $\beta_2$ m variants and rabbit- $\beta_2$ m) were expressed in *E. coli* as  
59 described previously [1]. Two purification protocols were used to purify the different  $\beta_2$ m variants. The  
60 initial protocol was performed as described in [1] and was used to purify most of the D76X- $\beta_2$ m series, all  
61 the D76N-X- $\beta_2$ m variants and rabbit- $\beta_2$ m. Four D76X- $\beta_2$ m variants could not be purified using this  
62 protocol since they had a very low refolding yield. For these variants the protocol was optimised. Anion  
63 exchange chromatography was performed in 25 mM Tris-HCl, pH 8.0, 8 M urea with a NaCl gradient (0 to  
64 0.5 M over five column volumes), using a column packed with four pre-packed HiTrap Q HP columns  
65 (GE Healthcare). Dithiothreitol (DTT) (10 mM) was added to samples for 20 min (at ~20 °C) prior to  
66 loading onto the anion exchange column. The appropriate fractions from anion exchange were pooled and  
67 refolded by rapidly diluting (10-fold) the protein into refolding buffer (0.7 M arginine, pH 8.0). The  
68 refolded protein was dialysed four times with 25 mM ammonium bicarbonate pH 8.0, at 4°C (SnakeSkin™  
69 Dialysis Tubing, 3.5k MWCO and 22 mm). Finally, the protein was lyophilised before being resuspended  
70 in 20 mM ammonium bicarbonate pH 8.0 and purified to homogeneity using gel filtration, as described in  
71 [1]. All proteins were judged to be more than 99 % pure using SDS-PAGE, monomeric using size  
72 exclusion chromatography (HiLoad 16/600 Superdex 75 PG), folded into a native structure at 20 °C  
73 measured using far-UV CD (Chirascan Plus) and of the expected mass (confirming formation of the  
74 disulphide bond) using ESI-MS (Xevo G2-XS Q-TOF, Waters UK, Manchester).

75

## 76 ***In vitro* fibrillation assays**

77 For fibrillation assays, protein was either stored as a lyophilised powder or as a concentrated solution  
78 at -80 °C. Lyophilised protein was dissolved in 25 mM sodium phosphate buffer, pH 7.4 to a protein  
79 concentration of *ca.* 500-600  $\mu$ M and diluted to the desired concentration in the appropriate buffer. Stock  
80 solutions of protein were centrifuged at 14,000 *g* for 10 min before dilution into the appropriate buffer (25  
81 mM sodium phosphate buffer, pH 6.2). Sodium chloride was added from a 2 M stock to make the desired  
82 ionic strength of 200 mM and 10  $\mu$ M ThT and 0.01 % (*w/v*) NaN<sub>3</sub> were added to all experiments. Each  
83 condition was repeated 10 times in parallel from the same stock solution of protein and at least two  
84 biological repeats were performed. The assays contained 100  $\mu$ l of 40  $\mu$ M protein per well using Corning  
85 96 well polystyrene microtiter plates with transparent bottom and low binding. Plates were sealed with  
86 clear polyolefin sealing film (STAR-LAB) and incubated at 37 °C for 100 h with alternated shaking at 600  
87 rpm (350 s off shaking and 300 s with shaking for 367 cycles). ThT fluorescence was monitored at a single  
88 wavelength (excitation 440 nm and emission 480 nm) using a Fluostar Optima, BMG Labtech plate reader.  
89  $T_{\text{half}}$  values were calculated by fitting the normalised data for each replicate to a generalised logistic  
90 function (Equation 1) and calculating the time at the midpoint of the curve. This analysis was carried out  
91 using Prism 8 (version 8.2.1).

92

$$Y(t) = A + \frac{K - A}{\left(1 + Qe^{-B(t-M)\frac{1}{v}}\right)} \quad \text{Equation 1}$$

where  $A$  is the pre-transition baseline (lower asymptote),  $K$  is the post-transition baseline (upper asymptote),  $B$  is the growth rate and  $M$  is the time of maximal growth.  $Q$  and  $v$  are parameters which affect the transitions from and to the growth phase.  $Y$  is the normalised signal and  $t$  is time.

At the end of each assay the percent aggregated protein was determined by centrifugation on a bench top microfuge at 13,600 rpm for 10 min at room temperature, and analysis of the total protein, pellet and supernatant was determined using SDS-PAGE. The percent aggregate was then calculated by densitometry of the resulting bands using ImageJ.

### Negative stain electron microscopy (EM)

The ThT aggregation assay end point samples were centrifuged at 14,000  $g$  for 10 min and the pellet resuspended in a similar volume of HCl (one drop of 37 % HCl in 10 mL of ultra-pure water). 10  $\mu$ l of this solution was placed on carbon coated copper EM grids (homemade) previously glow discharged for 30 sec. The grids were then blotted with filter paper to remove excess solvent and sample. Grids were placed onto drops of 1 % (w/v) uranyl acetate for 30 sec to stain. Grids were blotted again, washed with water and air-dried before analysis. The images were collected using Jeol 1400 (120 keV Lab6 filament and Gatan US1000XP 2k x 2k CCD camera).

### Thermal denaturation monitored by far-UV CD

For thermal denaturation experiments, a spectrum at 25 °C was recorded. Next, the temperature was decreased to 10 or 20 °C and then increased in 5 °C steps with a setting time of 90 seconds at each temperature, up to 90 °C. At the end of the temperature ramp an additional spectrum was recorded 10 or 20 °C. Each spectrum was acquired from 190 nm to 260 nm with a step size of 1 nm with 1 second per point sampling. Two repeats were acquired for each temperature. The path length was 1 mm and samples contained 20  $\mu$ M protein in 25 mM sodium phosphate buffer, pH 6.2. The data were converted into mean residue molar ellipticity (MRE), plotted as a function of temperature, and fitted to a 2-state model (Equation 2) using the software package CDPal [2],

$$E = e^{\left(-\frac{\Delta H_m}{R}\left(\frac{1}{T_m} - \frac{1}{T}\right) - \frac{\Delta C_p}{R}\left(\frac{T_m}{T} - 1 + \ln\left(\frac{T}{T_m}\right)\right)\right)} \quad \text{Equation 2}$$

where  $E$  is the MRE value,  $\Delta H_m$  is the change in enthalpy at the denaturation midpoint,  $T$  is the temperature recorded during the experiments in Kelvin,  $T_m$  is the melting temperature in Kelvin,  $\Delta C_p$  is the difference in heat capacity between the two states, and  $R$  is the gas constant.  $\Delta C_p$  was assumed to be independent of temperature. Because the thermal denaturation process was not fully reversible,  $T_{m,app}$

128 values are quoted.

### 130 **Equilibrium unfolding experiments monitored by fluorescence**

131 Urea denaturation experiments were used to calculate  $\Delta G^{\circ}_{UN}$  values for  $\beta_2m$  variants. 250 mL of  
132 urea stock solutions of 25 mM sodium phosphate buffer, pH 7.4 containing 0 M or 10.5 M urea were made  
133 in 250 mL volumetric flasks. The exact urea concentration was calculated using a Culti refractometer and  
134 Equation 3.

$$136 \quad [Urea] = 117.66 (\Delta N) + 29.753 (\Delta N)^2 + 185.56 (\Delta N)^3 \quad \text{Equation 3}$$

137  
138 where  $\Delta N$  is the difference in refractive index between the 0 M buffer and the 10.5 M urea buffers.

139  
140 Stock solutions containing 4  $\mu$ M of protein were made at urea concentrations of 0, 2, 4, 6, 8, and 10 M  
141 urea. The stock solutions were combined to make 1 mL solutions for every 0.2 M urea increment up to 10  
142 M. The solutions were incubated overnight at 25 °C before measurement of tryptophan fluorescence on a  
143 PTI Quantmaster C-61 spectrofluorimeter. Tryptophan fluorescence was excited at 280 nm and the  
144 emission monitored at 325 nm over 60 sec. The signal over 60 sec was then averaged and normalised to  
145 the signal of the 10 M sample and then corrected for the urea dependence of tryptophan fluorescence using  
146 Equation 4.

$$148 \quad y = \frac{(cx + d) + e^{\frac{G-mx}{RT}}(ax + b)}{e^{\frac{G-mx}{RT}} + 1} \quad \text{Equation 4}$$

149  
150 where  $G$  is  $\Delta G^{\circ}_{UN}$  in  $\text{kJ mol}^{-1}$ ,  $m$  is the  $m$ -value in  $\text{kJ mol}^{-1} \text{M}^{-1}$ ,  $R$  is the gas constant ( $8.314 \text{ J K}^{-1} \text{mol}^{-1}$ ),  $T$   
151 is temperature in Kelvin (298 K),  $(ax + b)$  and  $(cx + d)$  correspond to the pre and post transition baselines,  
152 respectively. Midpoint urea values were calculated by solving the equation where  $\Delta G^{\circ}_{UN} = 0 \text{ kJ mol}^{-1}$ .  
153 Equation 4 was then used to fit the normalised and corrected data to extract values for  $\Delta G^{\circ}_{UN}$  and the  $m$ -  
154 value.

### 156 **Prediction algorithms of stability solubility and amyloid propensity**

157 Structurally Corrected CamSol [3] was used with the webserver ([http://www-](http://www-mvsoftware.ch.cam.ac.uk)  
158 [mvsoftware.ch.cam.ac.uk](http://www-mvsoftware.ch.cam.ac.uk)) to predict protein solubility, where the pH was set at 6 and the patch radius at  
159 10 Å. The data for each amino acid were exported and plotted using Prism 8 to compare WT- and D76N-  
160  $\beta_2m$ , while the average CamSol value was used to compare different variants.

161  
162 Aggrescan 3D 2.0 [4, 5] was used with the online webserver (<http://biocomp.chem.uw.edu.pl/A3D/>),

163 where the dynamic mode was activated, the mutate residues was turned off and the distance of aggregation  
164 analysis was set up at 5 Å. The data for each amino acid were exported and plotted using Prism 8 to  
165 compare WT- and D76N- $\beta_2m$ , while the average Aggrescan 3D 2.0 value was used to compare different  
166 variants.

167  
168 For CamSol Structurally Corrected [3] and Aggrescan 3D 2.0 [4, 5], the PDB files used as input were  
169 1LDS [6] for WT- $\beta_2m$  and 4FXL [7] for D76N- $\beta_2m$  where the residue M0 was removed and the residues  
170 R97, D98 and M99 were added to 1LDS [6] to have similar number of residues to compare with D76N-  
171  $\beta_2m$ . The D76X variants were created using PyMol 2.1.0.

172  
173 Tango [8] was used with the webserver (<http://tango.crg.es>) to predict the propensity to form  $\beta$ -  
174 aggregates, where the pH was set at 6.2, the temperature at 310.15 K, the ionic strength = 0.2 M and the  
175 protein concentration at 0.04 M. The amino acid sequence was used as an input. The data for each amino  
176 acid were exported and plotted using Prism 8 to compare WT- and D76N- $\beta_2m$ , while the average Tango  
177 score was used to compare different variants.

178  
179 The value of the  $\beta$ -strand propensity of folded protein were obtained using [9].

### 181 **Crystallography of D76X- $\beta_2m$ variants**

182 Seven  $\beta_2m$  variants (D76E-, D76A-, D76S-, D76G-, D76Q-, D76Y- and D76K- $\beta_2m$ ) were crystallised  
183 by mixing 100 nL of mother liquor (15 % (v/v) glycerol, 0.1 M sodium acetate pH 4.5 to 5.5, 28 % to 32 %  
184 (v/v) PEG 4000 and 0.2 M ammonium acetate) with 200 nL of protein (500  $\mu$ M in 25 mM sodium  
185 phosphate buffer, pH 6.2) at 293 K in Swissci 96-well 3-prop plates (vapour diffusion, sitting drop).  
186 Crystals were flash-frozen to 100 K in liquid nitrogen without supplementation of additional  
187 cryoprotectants. Diffraction data were collected at the European Synchrotron Radiation Facility (Grenoble,  
188 France) at MASSIF-1 beamline and at Diamond Light Source (England) I24 beamline with a PIXEL  
189 detector. Data were processed with XDS [10] and AIMLESS [11] structures solved by molecular  
190 replacement using the program PHASER [12] and WT- $\beta_2m$  as search model (PDB: 2YXF [13]). The  
191 structures were refined with Refmac (5.8.0258) [14] and manual model building and structure analysis  
192 were performed with COOT [15]. PyMol (2.3.2) was used for the preparation of the figures. The  
193 coordinates were deposited as for D76E- (PDB 7NMC), D76A- (PDB 7NMR), D76S- (PDB 7NMO),  
194 D76G- (PDB 7NMT), D76Q- (PDB 7NMV), D76Y- (PDB 7NMY) and D76K- $\beta_2m$  (PDB 7NN5).

### 196 **Creation of the $\beta$ La-D76N- $\beta_2m$ library**

197 The Diversify PCR Random Mutagenesis Kit (Takara) was used to synthesise a D76N- $\beta_2m$   
198 megaprimer, using forward (5'-GTGGTGGTGGCTCGA) and reverse (5'-AACCGCTCCCGGATC)

199 primers that anneal to the Gly/Ser linker regions up- and down-stream of the D76N- $\beta_2m$  sequence. The  
200 product was purified on a 1 % (w/v) agarose gel and the desired band was excised and purified using  
201 Qiagen Gel Extraction Kit, according to the manufacturer's instructions. To prevent expression of wild-  
202 type  $\beta$ La-D76N- $\beta_2m$  after ligation, a 'stop template' plasmid was created. To this end, two stop codons  
203 were inserted into  $\beta$ -lactamase (amino acid positions 16 & 17) in the pMB1- $\beta$ La-D76N- $\beta_2m$  plasmid using  
204 the Q5 Site-Directed Mutagenesis Kit (New England BioLab). A ten-fold excess of D76N- $\beta_2m$   
205 megaprimer was added to the  $\beta$ La-D76N- $\beta_2m$  stop template and splicing performed using the QuikChange  
206 Lightning Site-Directed Mutagenesis Kit (Agilent). Two microlitres DpnI was then added to each reaction  
207 (1 h at 37 °C) to remove template DNA. The product was purified using Qiagen PCR Purification Kit and  
208 2  $\mu$ L was used to transform TG1 electrocompetent cells (Lucigen) by electroporation (2.5 kV field  
209 strength, 335  $\Omega$  resistance and 15  $\mu$ F capacitance). Following recovery, cells were plated onto pre-  
210 prepared LB bioassay agar plates containing 10  $\mu$ g mL<sup>-1</sup> tetracycline and incubated overnight at 37 °C.

211  
212 Single colonies were picked for sequence analysis before the remaining colonies (approximately 10<sup>6</sup>)  
213 were removed from the bioassay plates by addition of 10 mL LB medium and scraping off. The culture  
214 was centrifuged (10 minutes, 5 000 g) before DNA extraction using the Qiagen Midiprep Kit, according to  
215 the manufacturer's instructions.

### 216 217 **Directed evolution and selection of $\beta_2m$ variants using the TPBLA**

218 Directed evolution bioassay assay plates were prepared containing 2.5 % (w/v) LB, 1.5 % (w/v) agar,  
219 10  $\mu$ g mL<sup>-1</sup> tetracycline, 0.075 % (w/v) arabinose and 120 or 140  $\mu$ g mL<sup>-1</sup> ampicillin. SCS1  
220 supercompetent cells (Agilent) were thawed on ice for 10 minutes and 50  $\mu$ L cells transferred to a 14 mL  
221 round-bottomed transformation tube. Two microlitres of the prepared library plasmid DNA (100 ng  $\mu$ L<sup>-1</sup>)  
222 was added to the cells and incubated on ice for 30 min before heat shocking at 42 °C for 45 sec. After 5  
223 min incubation on ice, 950  $\mu$ L SOC medium was added to cells and incubated (37 °C and 200 rpm) for 1 h.  
224 Three millilitres SOC medium was then added to the cells along with 10  $\mu$ g mL<sup>-1</sup> tetracycline. Cells were  
225 incubated for 4 h and  $\beta$ -lactamase expression then induced with 0.075 % (w/v) arabinose. Cells were then  
226 incubated (37 °C and 200 rpm) for 1 h. The culture was spread onto the prepared assay plates and  
227 incubated overnight at 37 °C. The day after, the colonies were selected and sent for sequencing in a 96-  
228 well plate (Eurofins). 1 $\sigma$  and 2 $\sigma$  (1 or 2 standard deviation from the mean) in Fig. 4A was calculated using  
229 all the mutation frequency found in the 209 sequences.

### 230 231 **Prediction of the protein stability and protein aggregation using Solubis**

232 A saturated mutation scan was performed on the sequence of D76N- $\beta_2m$ , resulting in 1900 mutant  
233 sequences. All sequences were analysed using Tango [8]. APRs were determined considering Tango  
234 scores above 5 for at least 5 consecutive residues. The total Tango score was summed for the entire

235 sequence. The difference in Tango score ( $\Delta\text{Tango}_{\text{Mutant}} = \text{Tango}^{\text{D76N}}_{\text{Mutant}} - \text{Tango}^{\text{D76N}}$ ) was calculated for  
236 each mutation. FoldX [16] was used to calculate the effect of each mutation on the thermodynamic  
237 stability of D76N- $\beta_2\text{m}$  (PDB 4FXL [7]). First the structure was repaired using the FoldX command  
238 ‘RepairPDB’. All mutations were calculated using the ‘BuildModel’ command with the repaired structure  
239 and input and the mutants listed in the ‘individual\_list.txt’ file format. The column ‘total energy’ was used  
240 from the output file ‘Average\_BuildModel\_RepairPDB\_4FXL.fxout’.

241

## 242 **Sequence alignment**

243 An initial selection of  $\beta_2\text{m}$  sequences was obtained from a protein BLAST  
244 (<https://www.ncbi.nlm.nih.gov/pubmed/2231712>) search with the human  $\beta_2\text{m}$  sequence (UniProt P61769)  
245 as query on the NCBI’s non-redundant (NR) database. Sequences corresponding to PDB structures or  
246 containing “synthetic” in the description were manually removed, as well as those from non-mammalian  
247 organisms. The remaining sequences were aligned using Clustal Omega  
248 (<https://pubmed.ncbi.nlm.nih.gov/21988835/>) and trimmed to keep only the region corresponding to the  
249 mature human  $\beta_2\text{m}$  sequence. Partial sequences with missing residues in this region were further removed  
250 to provide a set of 262 representative mammalian sequences (see SI Appendix Fig. S15). The residue  
251 conservation was analysed using an in-house developed script and the corresponding image was generated  
252 using the WebLogo (<https://pubmed.ncbi.nlm.nih.gov/15173120/>) server implemented at  
253 <https://weblogo.berkeley.edu>.

254



255 **SI Appendix Table S1. Experimental differences in stability and aggregation kinetics of WT- and**  
256 **D76N- $\beta_2m$**

257

|                                                                 | <b>WT-<math>\beta_2m</math></b> | <b>D76N-<math>\beta_2m</math></b> |
|-----------------------------------------------------------------|---------------------------------|-----------------------------------|
| <b><math>T_{m,app}</math> (°C)</b>                              | 65.2 $\pm$ 0.4                  | 53.8 $\pm$ 0.2                    |
| <b><math>\Delta G^{\circ}_{UN}</math> (kJ mol<sup>-1</sup>)</b> | -29.2 $\pm$ 0.2                 | -18.6 $\pm$ 0.2                   |
| <b>m value (kJ mol<sup>-1</sup> M<sup>-1</sup>)</b>             | 5.05 $\pm$ 0.29                 | 4.84 $\pm$ 0.37                   |
| <b><math>T_{half}</math> (hours)</b>                            | -                               | 13.7 $\pm$ 1.6                    |

258

259 The  $T_{m,app}$  was measured at pH 6.2. The  $\Delta G^{\circ}_{UN}$  and m value were measured at 25 °C and pH 7.4. The  $T_{half}$   
260 was measured at 37 °C and pH 6.2. “-” indicates no fibrils (no significant increase in ThT fluorescence  
261 occurred during the 100 h time course of the experiment). Error bars are the fitting errors.

262 **SI Appendix Table S2. Solubility and aggregation propensity of WT- and D76N- $\beta_2$ m predicted by**  
 263 **different algorithms**

264

|                                                           | <b>WT-<math>\beta_2</math>m</b> | <b>D76N-<math>\beta_2</math>m</b> |
|-----------------------------------------------------------|---------------------------------|-----------------------------------|
| <b>Protein solubility / Structure</b>                     |                                 |                                   |
| CamSol [3] (Structure corrected score)                    | 0.917594                        | 0.865713                          |
| Aggrescan 3D [4, 5] (Average score)                       | -1.1797                         | -1.1099                           |
| SOLart [17, 18] (Scaled solubility value)                 | 81.1 %                          | 75.2 %                            |
| <b>Aggregation propensity / Sequence</b>                  |                                 |                                   |
| Tango [8] (Total aggregation score)                       | 784.84                          | 784.62                            |
| SALSA [19] (Area under the curve of SALSA score)          | 3070.3565                       | 3070.3565                         |
| <b>Aggregation propensity / Structure</b>                 |                                 |                                   |
| PASTA 2.0 [20] (Best energy)                              | -4.74108                        | -4.74108                          |
| FoldX [16] (Energy difference in kcal mol <sup>-1</sup> ) | -0.738971                       | 1.10492                           |
| SDM [21] (predicted $\Delta\Delta G$ )                    | -0.17                           | -0.22                             |

265

266 The PDB codes used were 1LDS [6] for WT- $\beta_2$ m and 4FXL [7] for D76N- $\beta_2$ m, where the residue M0 was  
 267 removed and the residues R97, D98 and M99 were added to 1LDS [6] to have similar number of residues  
 268 to compare with D76N- $\beta_2$ m. The conditions were adjusted to match those used here experimentally (40  
 269  $\mu$ M protein, 20 mM sodium phosphate buffer, 115 mM NaCl, pH 6.2 and 37 °C) as far as possible.

270 SI Appendix Table S3. Yield, stability and aggregation rates of the twenty D76X-β<sub>2m</sub> variants

271

|                      | Yield (mg / L culture) | T <sub>m;app</sub> (°C) | T <sub>half</sub> (hours) | % insoluble fraction |
|----------------------|------------------------|-------------------------|---------------------------|----------------------|
| WT-β <sub>2m</sub>   | 40.0                   | 65.2 ± 0.4              | -                         | 0                    |
| D76E-β <sub>2m</sub> | 21.7                   | 58.0 ± 0.2              | 65.3 ± 21.2               | 39.8                 |
| D76A-β <sub>2m</sub> | 13.0                   | 56.6 ± 0.4              | 29.3 ± 13.6               | 57.4                 |
| D76T-β <sub>2m</sub> | 8.6                    | 53.5 ± 0.8              | 23.1 ± 8.2                | 79.7                 |
| D76S-β <sub>2m</sub> | 7.0                    | 54.9 ± 0.2              | 16.1 ± 9.2                | 81.4                 |
| D76V-β <sub>2m</sub> | 2.0                    | 51.6 ± 0.2              | 20.2 ± 4.4                | 66.1                 |
| D76N-β <sub>2m</sub> | 15.0                   | 53.8 ± 0.2              | 9.6 ± 3.8                 | 97.5                 |
| D76Q-β <sub>2m</sub> | 4.4                    | 52.5 ± 0.7              | 10.5 ± 3.1                | 94.9                 |
| D76G-β <sub>2m</sub> | 9.9                    | 53.7 ± 0.4              | 17.6 ± 8.2                | 86.3                 |
| D76Y-β <sub>2m</sub> | 2.0                    | 45.8 ± 0.9              | -                         | 22.1                 |
| D76H-β <sub>2m</sub> | 6.0                    | 50.1 ± 0.4              | 14.4 ± 0.7                | 81.2                 |
| D76M-β <sub>2m</sub> | 1.0 (2.3)              | 48.7 ± 0.4              | 10.3 ± 1.2                | 19.6                 |
| D76L-β <sub>2m</sub> | 0.4                    | 41.1 ± 0.4              | -                         | 29.9                 |
| D76P-β <sub>2m</sub> | -(3.3)                 | 41.4 ± 0.4              | 60.7 ± 6.4                | 32.8                 |
| D76I-β <sub>2m</sub> | 1.7                    | 46.2 ± 1.4              | -                         | 39.9                 |
| D76K-β <sub>2m</sub> | 0.4 (0.7)              | 51.6 ± 0.8              | 14.7 ± 2.0                | 80.1                 |
| D76W-β <sub>2m</sub> | -(2.0)                 | 40.3 ± 0.3              | -                         | 0                    |
| D76F-β <sub>2m</sub> | 0.8                    | 43.4 ± 0.8              | -                         | 67.7                 |
| D76C-β <sub>2m</sub> | -(13.3)                | 46.2 ± 0.5              | -                         | 56.8                 |
| D76R-β <sub>2m</sub> | -(0.8)                 | 37.9 ± 0.8              | -                         | 40.5                 |

272

273 **Yield (mg pure protein / L of culture):** expression and purification yield of the twenty D76X-β<sub>2m</sub>  
274 variants listed in order of decreased *in vivo* growth score. 16 variants were successfully purified using a  
275 common protocol used for wild-type β<sub>2m</sub> [1] (see Methods), while four variants could only be purified in  
276 sufficient yield by adaptation of the method specific to each sequence (D76P-, D76W-, D76C- and D76R-  
277 β<sub>2m</sub> (the yields given in brackets correspond to the “optimised” protocol). **T<sub>m;app</sub> (°C):** protein stability  
278 determined for the twenty D76X-β<sub>2m</sub> variants using temperature ramp monitored by far-UV CD at 216 nm  
279 (Methods). The error is the fitting error. **T<sub>half</sub> (hours):** half time of protein aggregation (40 μM protein, in  
280 25 mM sodium phosphate buffer, pH 6.2, containing 115 mM NaCl, 37 °C, shaking) determined for the  
281 twenty D76X-β<sub>2m</sub> variants using ThT fluorescence. The data were fitted using a sigmoidal model and the  
282 error represents one standard deviation of the T<sub>half</sub> values obtained from 8-10 repeats. “-” indicates that no  
283 significant increase in ThT fluorescence was observed during the 100 h time course of the experiment. **%**  
284 **insoluble fraction:** percentage of insoluble protein at the end of the ThT aggregation assay determined for  
285 the twenty D76X-β<sub>2m</sub> variants using centrifugation followed by SDS-PAGE (Methods). The experimental  
286 data for each of these variants are shown in SI Appendix Fig. S6.

|                                                         | D76E-<br>β <sub>2m</sub>      | D76A-<br>β <sub>2m</sub>      | D76S-<br>β <sub>2m</sub>            | D76G-<br>β <sub>2m</sub>    | D76Q-<br>β <sub>2m</sub>        | D76Y-<br>β <sub>2m</sub>      | D76K-<br>β <sub>2m</sub>      |
|---------------------------------------------------------|-------------------------------|-------------------------------|-------------------------------------|-----------------------------|---------------------------------|-------------------------------|-------------------------------|
| <b>Data collection</b>                                  |                               |                               |                                     |                             |                                 |                               |                               |
| Beamline                                                | I24<br>(Diamond)              | I24<br>(Diamond)              | MASSIF-1<br>(ESRF)                  | MASSIF-1<br>(ESRF)          | MASSIF-1<br>(ESRF)              | I24<br>(Diamond)              | I24<br>(Diamond)              |
| Space group                                             | I <sub>121</sub>              | I <sub>121</sub>              | I <sub>121</sub>                    | I <sub>121</sub>            | I <sub>121</sub>                | I <sub>121</sub>              | I <sub>121</sub>              |
| PDB ID                                                  | 7NMC                          | 7NMO                          | 7NMR                                | 7NMT                        | 7NMV                            | 7NMY                          | 7NN5                          |
| <i>Cell dimensions</i>                                  |                               |                               |                                     |                             |                                 |                               |                               |
| <i>a, b, c</i> (Å)                                      | 54.6 28.9<br>67.6             | 55.7 28.8 62.3                | 53.4 28.8<br>63.0                   | 55.4 28.7<br>62.5           | 54.3 28.8<br>67.6               | 51.7 27.7<br>64.5             | 51.4 27.7<br>60.1             |
| <i>α, β, γ</i> (°)                                      | 90.0 102.1<br>90.0            | 90.0 98.4 90.0                | 90.0 97.0<br>90.0                   | 90.0 98.5<br>90.0           | 90.0 102.0<br>90.0              | 90.0 101.24<br>90.0           | 90.0 96.7<br>90.0             |
| Resolution (Å)                                          | 46.60 - 1.20<br>(1.22 - 1.20) | 44.41 - 1.20<br>(1.22 - 1.20) | 38.20 -<br>1.15<br>(1.17 -<br>1.15) | 44.43 - 1.20<br>(1.22-1.20) | 46.4 - 1.51<br>(1.54 - 1.51)    | 43.98 - 1.25<br>(1.27 - 1.25) | 41.24 - 1.24<br>(1.26 - 1.24) |
| <i>R</i> <sub>pim</sub> (%)                             | 0.046<br>(0.306)              | 0.014<br>(0.066)              | 0.031<br>(0.916)                    | 0.037<br>(0.219)            | 0.085<br>(0.716)                | 0.032<br>(0.927)              | 0.034<br>(0.405)              |
| <i>I</i> / σ( <i>I</i> )                                | 12.5<br>(3.5)                 | 32.4<br>(10.2)                | 10.7<br>(0.8)                       | 10.7<br>(2.9)               | 7.9<br>(3.6)                    | 14.6<br>(0.9)                 | 13.2<br>(1.8)                 |
| Completeness (%)                                        | 96.3<br>(77.0)                | 97.7<br>(92.3)                | 98.6<br>(98.4)                      | 98.4<br>(97.1)              | 95.6<br>(95.7)                  | 98.0<br>(81.4)                | 97.2<br>(72.4)                |
| Redundancy                                              | 5.6<br>(4.0)                  | 6.3<br>(5.2)                  | 2.8<br>(2.8)                        | 2.6<br>(2.4)                | 2.7<br>(2.3)                    | 7.0<br>(5.3)                  | 3.7<br>(2.7)                  |
| CC(1/2)                                                 | 0.994<br>(0.828)              | 0.999<br>(0.988)              | 0.998<br>(0.504)                    | 0.997<br>(0.911)            | 0.982<br>(0.354)                | 0.999<br>(0.448)              | 0.999<br>(0.691)              |
| <b>Refinement</b>                                       |                               |                               |                                     |                             |                                 |                               |                               |
| Resolution (Å)                                          | 46.60 - 1.25<br>(1.22 - 1.20) | 44.41 - 1.20<br>(1.22 - 1.20) | 38.20 -<br>1.15<br>(1.17 -<br>1.15) | 44.43 - 1.20<br>(1.22-1.20) | 46.4 - 1.51<br>(1.54 -<br>1.51) | 43.98 - 1.25<br>(1.27 - 1.25) | 41.24 - 1.24<br>(1.26 - 1.24) |
| No. of reflections                                      | 175 528<br>(4 957)            | 189 821<br>(7 420)            | 95 491<br>(4 461)                   | 77 573<br>(3491)            | 41 608<br>(1 737)               | 172 185<br>(5 236)            | 85 357<br>(2 282)             |
| No. of unique reflections                               | 31 346<br>(1 236)             | 30 020<br>(1 429)             | 33 548<br>(1 614)                   | 30 235<br>(1 458)           | 15 590<br>(767)                 | 24 565<br>(988)               | 23 336<br>(844)               |
| <i>R</i> <sub>work</sub> / <i>R</i> <sub>free</sub> (%) | 15 / 16                       | 13 / 16                       | 15 / 18                             | 14 / 17                     | 22 / 27                         | 16 / 21                       | 19 / 23                       |
| <b>No. of atoms</b>                                     |                               |                               |                                     |                             |                                 |                               |                               |
| Protein                                                 | 856                           | 842                           | 818                                 | 852                         | 838                             | 853                           | 829                           |
| Non-covalent ligands                                    | 22                            | 0                             | 18                                  | 0                           | 0                               | 0                             | 0                             |
| Water                                                   | 167                           | 153                           | 131                                 | 162                         | 138                             | 115                           | 103                           |
| <b>RSMD</b>                                             |                               |                               |                                     |                             |                                 |                               |                               |
| Bond lengths (Å)                                        | 0.0100                        | 0.0223                        | 0.0168                              | 0.0182                      | 0.0110                          | 0.0431                        | 0.0334                        |
| Bond angles (°)                                         | 1.499                         | 2.2713                        | 1.8928                              | 2.1387                      | 1.7064                          | 3.282                         | 2.4183                        |
| B-factor (Å <sup>2</sup> )                              | 15.637                        | 16.711                        | 20.470                              | 15.912                      | 14.384                          | 19.957                        | 12.336                        |

291 **SI Appendix Table S5. Comparison of the RMSD of WT- or D76N- $\beta_2m$  and the different variants**

292

|                                   | <b>RMSD <i>c.f.</i> WT-<math>\beta_2m</math> (Å)</b> | <b>RMSD <i>c.f.</i> D76N-<math>\beta_2m</math> (Å)</b> |
|-----------------------------------|------------------------------------------------------|--------------------------------------------------------|
| <b>D76A-<math>\beta_2m</math></b> | 0.157                                                | 0.281                                                  |
| <b>D76E-<math>\beta_2m</math></b> | 0.090                                                | 0.273                                                  |
| <b>D76G-<math>\beta_2m</math></b> | 0.197                                                | 0.307                                                  |
| <b>D76K-<math>\beta_2m</math></b> | 0.588                                                | 0.349                                                  |
| <b>D76Q-<math>\beta_2m</math></b> | 0.117                                                | 0.281                                                  |
| <b>D76S-<math>\beta_2m</math></b> | 0.131                                                | 0.268                                                  |
| <b>D76Y-<math>\beta_2m</math></b> | 0.565                                                | 0.326                                                  |

293

294 The RMSD was calculated using all heavy atoms of the structure in PyMol. All these values are lower than  
295 0.6 Å indicating that all structures are highly similar. The only difference observed is in the EF-loop as  
296 shown in SI Appendix Fig. S7.

297

298 **SI Appendix Table S6. List of the 10 unique sequences containing substitutions at residue 76 with an**  
 299 **improved growth score in the TPBLA**  
 300

|                                           | <b>Amino acid substitutions</b>                                                                       |
|-------------------------------------------|-------------------------------------------------------------------------------------------------------|
| <b>Restoring WT-<math>\beta_2m</math></b> | <b>N76D</b>                                                                                           |
| <b>N76D + one amino acid change</b>       | I46V/ <b>N76D</b><br>S57G/ <b>N76D</b><br>K58E/ <b>N76D</b><br><b>N76D</b> /Y78F<br><b>N76D</b> /V85E |
| <b>N76D + two amino acid changes</b>      | R3G/ <b>N76D</b> /K91E                                                                                |
| <b>N76D + mutation in the APR</b>         | I35V/ <b>W60R</b> / <b>N76D</b><br>L65S/K75E/ <b>N76D</b>                                             |
| <b>N76S + mutation in the APR</b>         | <b>W60R</b> / <b>N76S</b>                                                                             |

301  
 302 The mutation N76D, which restores the WT- $\beta_2m$  sequence is shown in bold, amino acid substitutions in  
 303 the APR are in orange and the substitution N76S is in green.

304 **SI Appendix Table S7. List of the 46 unique D76N+X-β<sub>2m</sub> sequences giving rise to a high**  
 305 **aggregation resistance in the TPBLA and that do not contain substitutions at residue 76**  
 306

|                                              | <i>in vivo</i> growth rank order | Mutation (D76N+X-β <sub>2m</sub> )                   | FoldX        | Tango          |
|----------------------------------------------|----------------------------------|------------------------------------------------------|--------------|----------------|
| One mutation in the APR<br><b>Residue 60</b> | 24                               | <b>W60G</b>                                          | 1.744        | -184.26        |
|                                              | 28                               | Q8R/ <b>W60G</b>                                     | 1.276        | -184.15        |
|                                              | 41                               | Y10F/ <b>W60G</b>                                    | 1.066        | -183.59        |
|                                              | 40                               | S20P/ <b>W60G</b> /K94R                              | 6.306        | -185.00        |
|                                              | 38                               | I35V/ <b>W60G</b> /K91E                              | 3.386        | -185.39        |
|                                              | 9                                | <b>W60R</b>                                          | 0.729        | -127.36        |
|                                              | 43                               | I1T/ <b>W60R</b>                                     | 1.773        | -127.33        |
|                                              | 31                               | N24D/ <b>W60R</b>                                    | 1.507        | -144.73        |
|                                              | 11                               | S57G/ <b>W60R</b>                                    | 0.080        | -127.16        |
| One mutation in the APR<br><b>Residue 62</b> | 1                                | <b>F62S</b>                                          | 2.838        | -346.85        |
|                                              | 30                               | V27A/ <b>F62S</b> /Y67N                              | 8.160        | -631.19        |
|                                              | 37                               | <b>F62S</b> /S88P/K94R                               | 1.463        | -347.56        |
|                                              | 44                               | <b>F62P</b>                                          | 4.187        | -506.74        |
|                                              | 27                               | <b>F62L</b> /H84R/W95R                               | 18.190       | -13.62         |
| One mutation in the APR<br><b>Residue 63</b> | 36                               | <b>Y63D</b>                                          | 2.555        | -732.63        |
|                                              | 33                               | S11P/ <b>Y63D</b> /K75E                              | 4.318        | -732.92        |
|                                              | 14                               | <b>Y63H</b>                                          | 1.520        | -470.70        |
|                                              | 12                               | K48N/ <b>Y63H</b>                                    | 1.669        | -472.23        |
|                                              | 16                               | T4A/ <b>Y63H</b> /Y67H/T86A                          | 2.120        | -708.77        |
|                                              | 29                               | <b>Y63N</b>                                          | 2.406        | -389.48        |
|                                              | 23                               | <b>Y63N</b> /L87S                                    | 5.165        | -389.48        |
|                                              | 20                               | Y26D/ <b>Y63N</b> /S88P                              | <b>1.929</b> | <b>-407.63</b> |
| One mutation in the APR<br><b>Residue 64</b> | 15                               | <b>L64P</b>                                          | 10.003       | -750.18        |
|                                              | 18                               | <b>L64P</b> /E69G                                    | 10.662       | -726.44        |
|                                              | 2                                | N24D/ <b>L64P</b> /V85A                              | 11.856       | -767.43        |
|                                              | 21                               | K58R/ <b>L64P</b> /I92T                              | 11.576       | -750.89        |
|                                              | 25                               | T7I/L23P/H51R/ <b>L64P</b> /Y67H                     | 22.455       | -766.39        |
| One mutation in the APR<br><b>Residue 65</b> | 10                               | <b>L65S</b>                                          | 3.162        | -253.41        |
|                                              | 8                                | <b>L65S</b> /D98G                                    | 3.061        | -254.97        |
|                                              | 6                                | K19R/S28P/V49A/ <b>L65S</b>                          | 10.537       | -270.81        |
|                                              | 22                               | R3S/T4A/N17D/ <b>L65P</b> /I92V                      | 6.254        | -747.10        |
| One mutation in the APR<br><b>Residue 66</b> | 4                                | F22L/K48E/ <b>Y66N</b>                               | 3.141        | -265.29        |
| Two mutations in the APR                     | 26                               | <b>W60R</b> / <b>L65S</b>                            | 3.908        | -417.62        |
|                                              | 17                               | S20P/ <b>W60R</b> / <b>F62S</b>                      | 7.888        | -427.24        |
|                                              | 35                               | F22L/ <b>W60R</b> / <b>Y63N</b>                      | 3.179        | -515.77        |
|                                              | 46                               | <b>W60R</b> / <b>Y63H</b> /T68A                      | 1.637        | -374.70        |
|                                              | 42                               | <b>W60R</b> / <b>Y63N</b> /N83S                      | 1.854        | -506.15        |
|                                              | 32                               | <b>F62S</b> / <b>L65S</b> /D96G                      | 6.374        | -727.84        |
|                                              | 7                                | <b>Y63H</b> / <b>L64P</b> /I92V                      | 12.010       | -750.13        |
|                                              | 34                               | T4A/ <b>L64P</b> / <b>L65S</b> /F70L                 | 13.094       | -750.18        |
|                                              | 45                               | K19E/ <b>W60R</b> / <b>L65S</b> /S88P                | 2.903        | -419.01        |
|                                              | 5                                | E36D/ <b>W60G</b> / <b>Y63H</b> /F70L                | 3.377        | -588.91        |
|                                              | 39                               | K48E/ <b>W60R</b> / <b>Y63H</b> /Q89R                | 1.909        | -401.98        |
|                                              | 19                               | I35V/N42S/ <b>Y63Q</b> / <b>L64P</b> /Y78H           | 15.910       | -750.17        |
|                                              | 3                                | E47G/H51Q/ <b>L64P</b> / <b>L65S</b> /K94R           | 12.385       | -750.91        |
|                                              | 13                               | N24D/Y26F/E47G/ <b>Y63H</b> / <b>L64P</b> /V85A/Q89L | 13.713       | -764.17        |

307  
 308 The 46 unique variants containing amino acid substitutions that improve their score in the TPBLA, but do  
 309 not contain substitutions at residue 76. Residues in the APR (residues 60-66) are highlighted in bold. The  
 310 *in vivo* growth score of these 46 unique sequences is shown in SI Appendix Fig. S10B. The predicted

311 stability using FoldX (in kcal mol<sup>-1</sup>) [16] and average aggregation propensity predicted using Tango [8] are  
312 shown (see also SI Appendix Fig. S10A).



313 **SI Appendix Table S8. Protein stability and aggregation for six selected/designed D76N+X-β<sub>2</sub>m**  
 314 **variants**  
 315

|                            | <i>In vivo</i> growth score (A.U.C.) | T <sub>m,app</sub> (°C) | T <sub>half</sub> (hours) |
|----------------------------|--------------------------------------|-------------------------|---------------------------|
| WT-β <sub>2</sub> m        | 1066 ± 83                            | 65.2 ± 0.4              | -                         |
| D76N-β <sub>2</sub> m      | 630 ± 10                             | 53.8 ± 0.2              | 9.6 ± 3.8                 |
| D76N_F62P-β <sub>2</sub> m | 980 ± 37                             | 53.9 ± 0.2              | 30.9 ± 2.2                |
| D76N_Y63D-β <sub>2</sub> m | 1120 ± 40                            | 54.2 ± 0.2              | 18.5 ± 3.4                |
| D76N_L64D-β <sub>2</sub> m | 740 ± 106                            | 41.2 ± 0.4              | 14.1 ± 5.5                |
| D76N_L64P-β <sub>2</sub> m | 973 ± 24                             | 32.2 ± 0.2              | ND                        |
| D76N_L65P-β <sub>2</sub> m | 873 ± 42                             | 13.1 ± 0.1              | ND                        |
| D76N_L65K-β <sub>2</sub> m | 1027 ± 101                           | 44.3 ± 0.6              | -                         |

316  
 317 ND: these values could not be determined as protein could not be purified in sufficient amounts for these  
 318 experiments. - : these proteins did not aggregate over the 100 h time-course in the condition tested (40 μM  
 319 protein, 25 mM sodium phosphate buffer, pH 6.2, 115 mM NaCl, 37 °C and shaking). See Fig. 5B for the  
 320 TPBLA and SI Appendix Fig. S13 for the raw data for the *in vivo* growth scores and T<sub>m</sub>/T<sub>half</sub>, respectively.  
 321 Note that a larger range of ampicillin concentration was used to determine the behaviour of these improved  
 322 variants (0 – 280 μg mL<sup>-1</sup> (see SI Appendix Methods)) and hence the A.U.C. is greater than those shown  
 323 for D76N- and WT-β<sub>2</sub>m in 1D and Fig. 3.

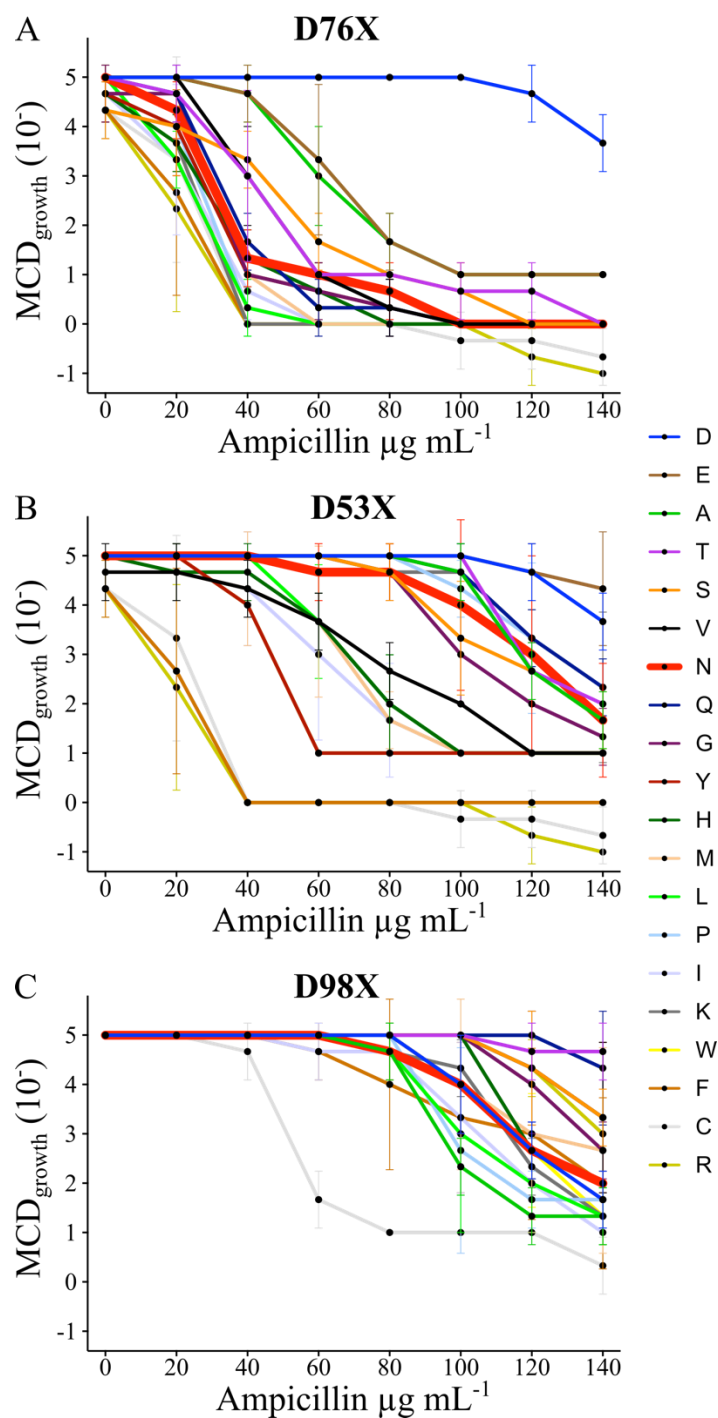

326

327

328 **Figure S1. Antibiotic survival curves for each of the twenty variants of D53X-, D76X-, and D98X-**329  **$\beta_2m$ .** Antibiotic survival curve of the maximal cell dilution allowing growth ( $MCD_{growth}$ ) on solid agar

330 medium over a range of ampicillin concentrations for bacteria expressing the twenty variants of (A) D76X,

331 (B) D53X- or (C) D98X- $\beta_2m$ . Colour coding is indicated in the right of the figure. The error bars represent332 one standard deviation ( $n = 3$  biologically independent experiments). “D” corresponds to WT- $\beta_2m$ .

333 **SI Appendix Figure S2.**

334

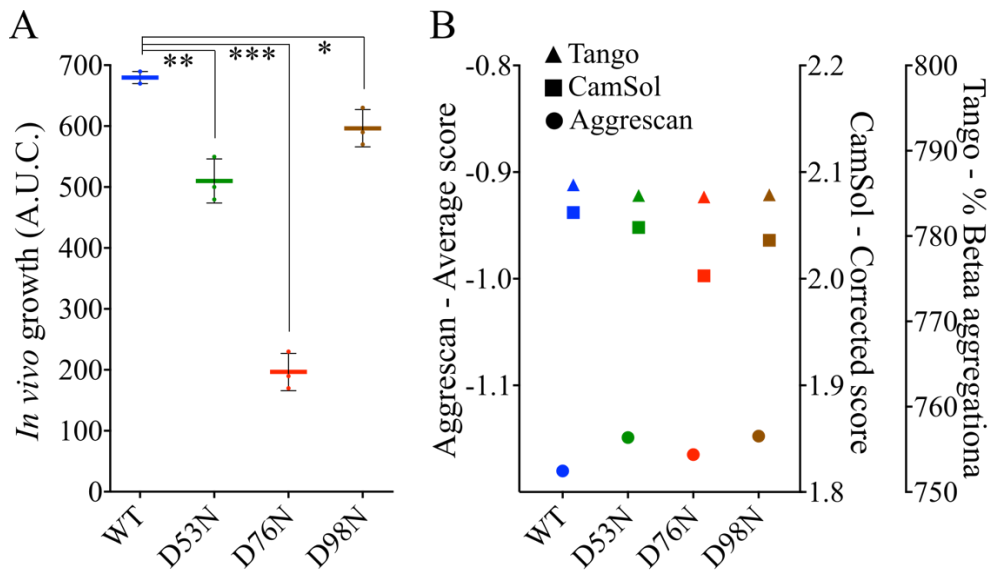

335

336

337 **Figure S2. Comparison of the effect of Asp to Asn substitutions at residues 53, 76 or 98 in the**  
 338 **TPBLA. (A)** *In vivo* growth score (A.U.C.) of WT-, D53N-, D76N- and D98N-β<sub>2</sub>m. Data represent mean  
 339 values (n = 3 biologically independent experiments), where each point corresponds to one experiment. The  
 340 error bars represent one standard deviation. Asterisks denote significance: \* corresponds to p = 0.04, \*\* p  
 341 = 0.01 and \*\*\* p = 0.002 (t-Test: Paired Two Sample for Means, two-tail). **(B)** Predictions of the  
 342 aggregation propensity of WT-, D53N-, D76N and D98N-β<sub>2</sub>m using structurally corrected Aggrescan 3D  
 343 2.0 (circles) [4, 5], structure corrected CamSol (squares) [3] and sequence-based Tango (triangles) [8]. The  
 344 PDB used for these computational predictions are 1LDS [6] for WT-β<sub>2</sub>m and 4FXL [7] for D76N-β<sub>2</sub>m  
 345 where the residue M0 was removed and the residues R97, D98 and M99 were added to 1LDS [6] to have  
 346 similar number of residues to compare with D76N-β<sub>2</sub>m.

347

## SI Appendix Figure S3

348

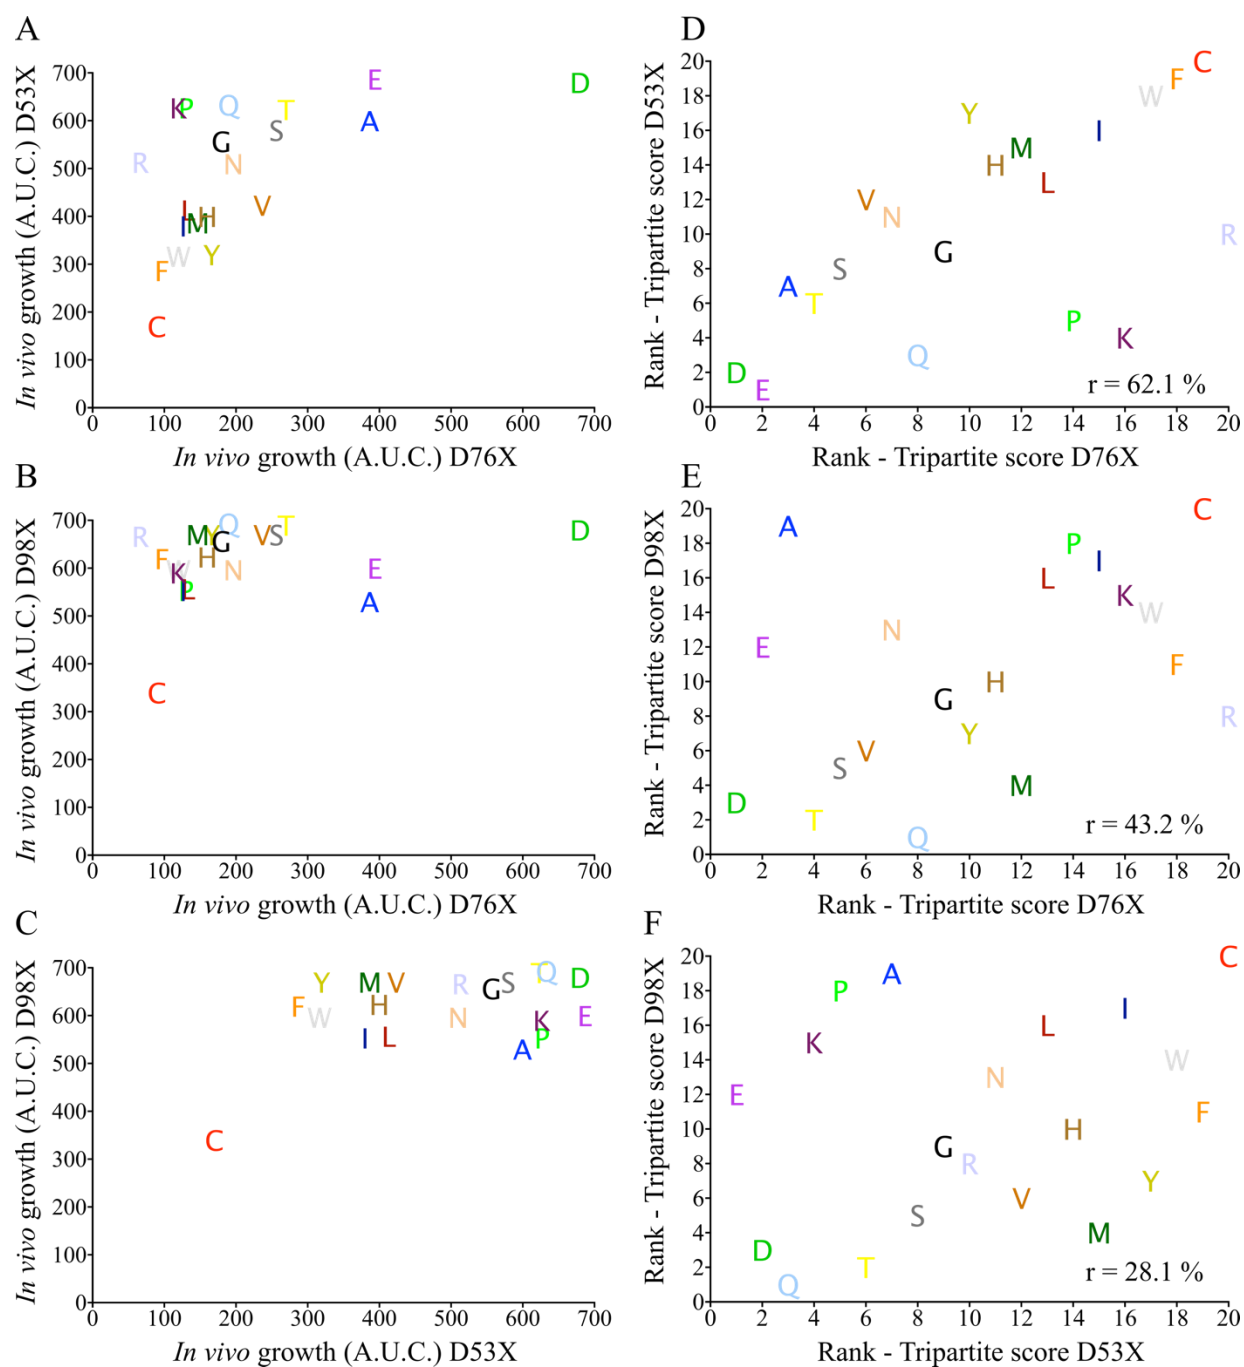

349

350

351 **Figure S3. Correlation of the behaviour of the three  $\beta_2m$  variant series at residues 53, 76 and 98.**352 Correlation between the *in vivo* growth scores (A.U.C) of (A) the D53X- and D76X- $\beta_2m$  series, (B) the353 D98X- and D76X- $\beta_2m$  series and (C) the D98X- and D53X- $\beta_2m$  series. (D-F) As (A-C), but for the ranked354 values. The  $r$  values were calculated using the rank-based Spearman correlations for (D-F). Each amino355 acid type is coloured the same in the six plots. “D” corresponds to WT- $\beta_2m$ .

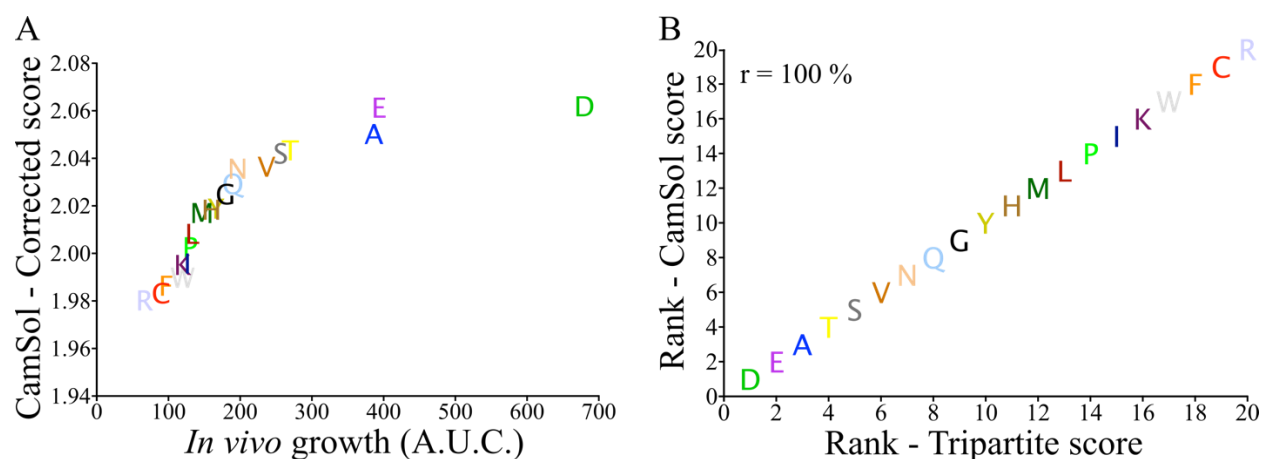

360 **Figure S4. Correlation between the TPBLA *in vivo* growth score and the solubility predicted by**  
 361 **CamSol for the 20 substitutions at residue 76.** Correlation between (A) the CamSol (structure corrected)  
 362 score [3] for the twenty D76X- $\beta_2m$  variants and their *in vivo* growth score (A.U.C.) or (B) the rank order  
 363 of the variants and the structure corrected CamSol score (where the highest A.U.C. score (best behaving  
 364 variant) corresponds to 1 and the lowest A.U.C. score (worst behaving) corresponds to 20). Note that  
 365 CamSol is an excellent predictor of the rank order of protein behaviour in the TPBLA despite the small  
 366 effects of single amino acid substitutions on the average CamSol score, as shown hitherto [3]. The r value  
 367 was calculated using a rank-based Spearman correlation for (B). Each amino acid type is coloured the  
 368 same in the two plots. "D" corresponds to WT- $\beta_2m$ .

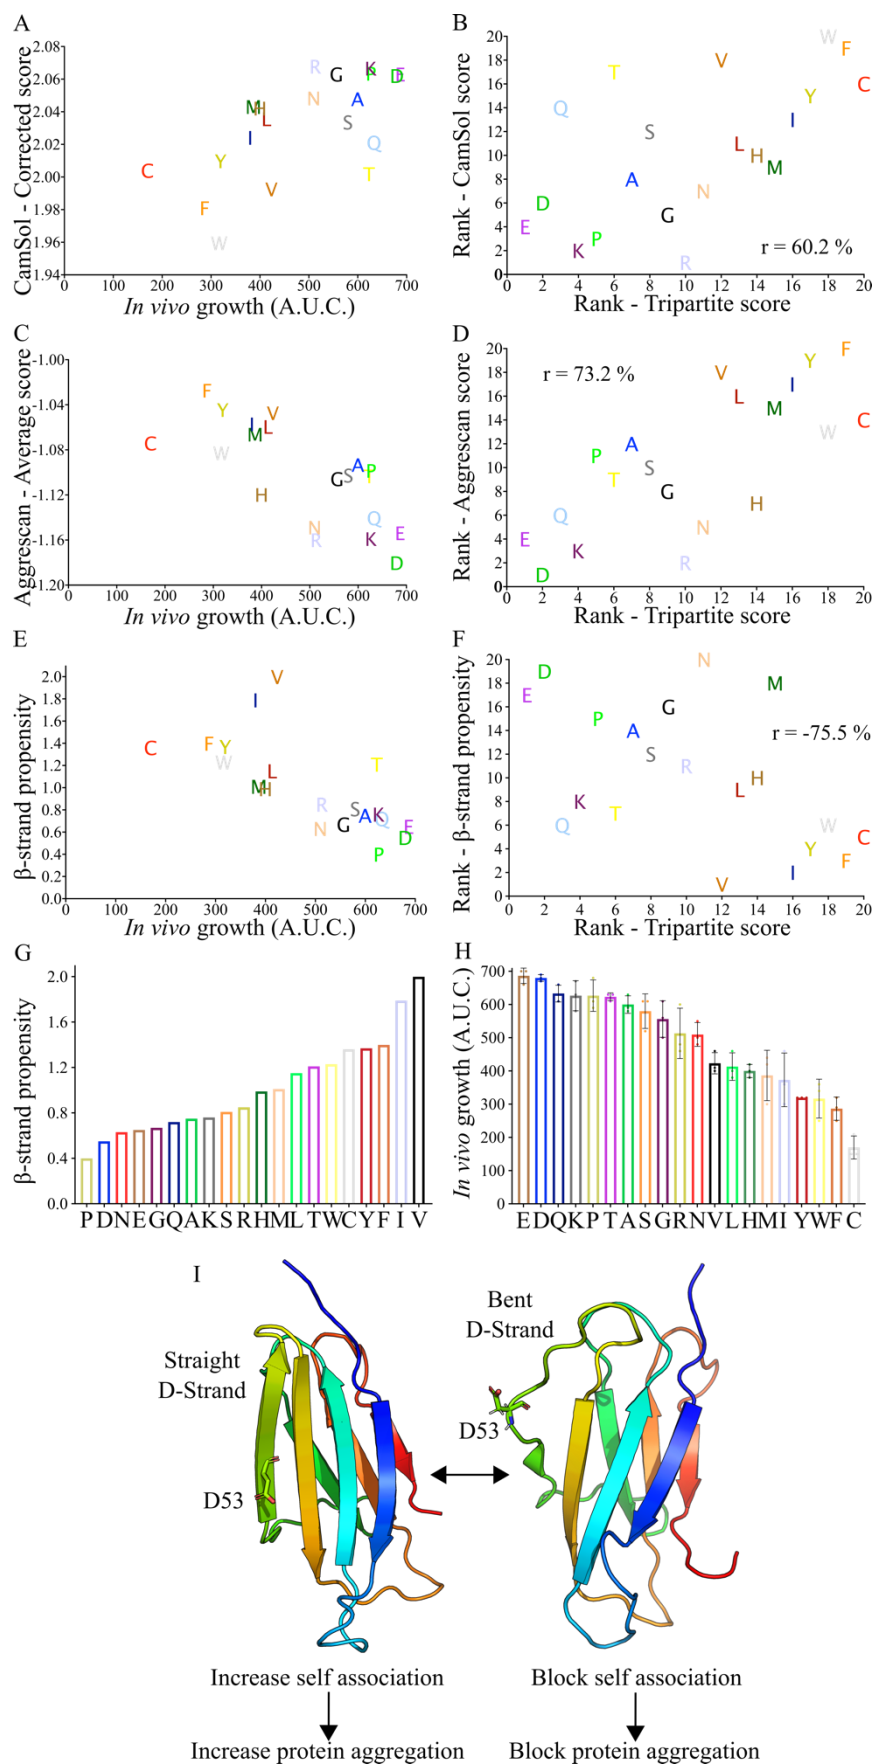

372

373 **Figure S5. Correlation between the TPBLA *in vivo* growth score, and prediction of aggregation,**  
374 **solubility or  $\beta$ -strand propensity for residue substitutions at position 53. (A,B)** Correlation between  
375 structure corrected CamSol [3] and the *in vivo* growth score for the D53X- $\beta_2$ m series. **(C,D)** Correlation  
376 between Aggrescan 3D [4, 5] 2.0 and the *in vivo* growth score for the D53X- $\beta_2$ m series. **(E,F)** Correlation  
377 between  $\beta$ -strand propensity [9] and *in vivo* growth score for the D53X- $\beta_2$ m series. Correlation between  
378 the rank order of Aggrescan 3D [4, 5] 2.0 **(B)**, structure corrected CamSol [3] **(D)** and  $\beta$ -strand propensity  
379 [9] **(F)** (where the lowest  $\beta$ -strand propensity corresponds to 1 and the highest to 20) and the rank *in vivo*  
380 growth score (where the highest A.U.C. score (best behaving variant) corresponds to 1 and the lowest  
381 A.U.C. score (worst behaving) corresponds to 20). The r value was calculated using the rank-based  
382 Spearman correlations for **(B,D,F)**. **(G)** Bar chart showing the  $\beta$ -strand propensity [9] for each D53X- $\beta_2$ m  
383 variant and **(H)** the *in vivo* growth score (A.U.C.) for the D53X- $\beta_2$ m series. Data represent mean values (n  
384 = 3 biologically independent experiments), where each point correspond to one experiment. The variants  
385 are ordered from the highest *in vivo* growth (A.U.C.) score (left) to the lowest score (right). The error bars  
386 (black) represent one standard deviation between replicates. Substitution by the same amino acid is  
387 coloured the same in all plots. The substitution “D” corresponds to WT- $\beta_2$ m. **(I)** The crystal (PDB: 1LDS  
388 [6]) (left) and solution structures (PDB: 2XKS [22]) (right) of WT- $\beta_2$ m. Note the different conformations  
389 of the D-strand in each structure, with the straight  $\beta$ -strand suggested previously as promoting aggregation  
390 [6].

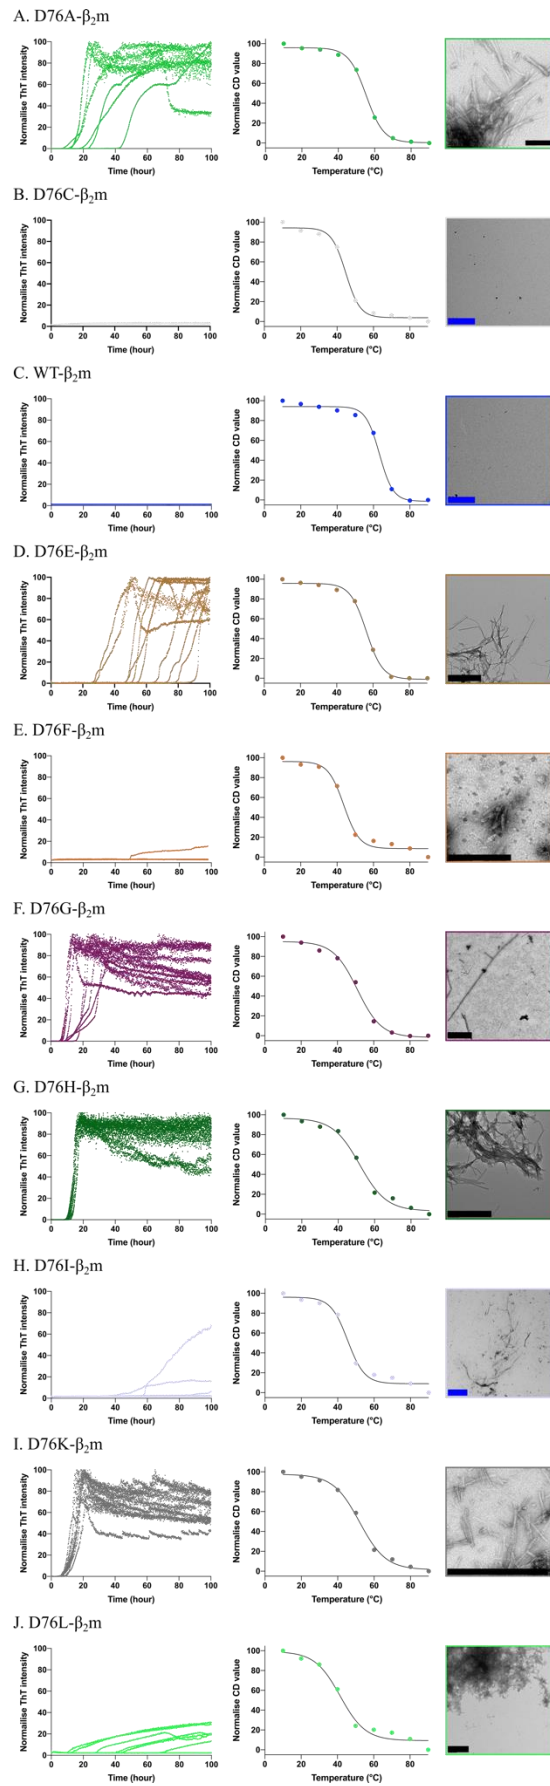



K. D76M- $\beta_2$ m

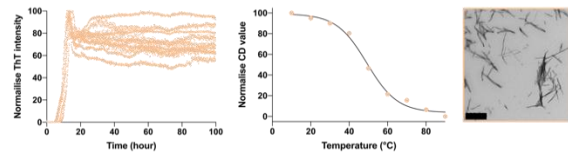

L. D76N- $\beta_2$ m

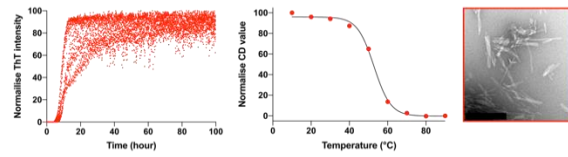

M. D76P- $\beta_2$ m

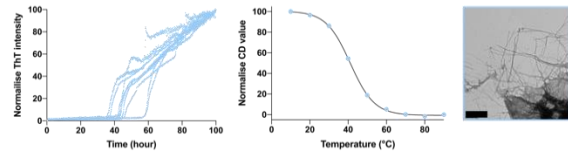

N. D76Q- $\beta_2$ m

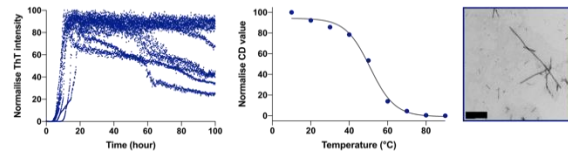

O. D76R- $\beta_2$ m

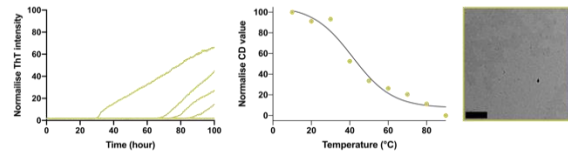

P. D76S- $\beta_2$ m

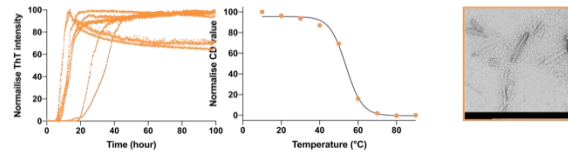

Q. D76T- $\beta_2$ m

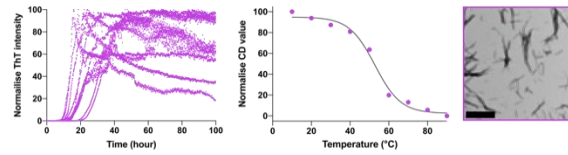

R. D76V- $\beta_2$ m

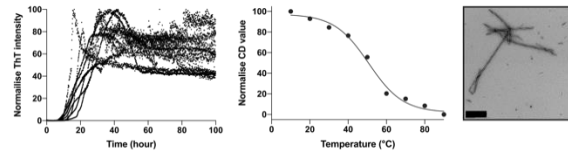

S. D76W- $\beta_2$ m

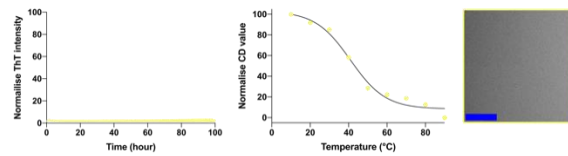

T. D76Y- $\beta_2$ m

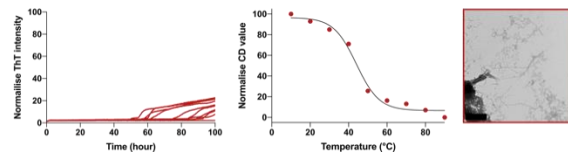

394 **Figure S6. Thermal stability and aggregation rates of the twenty D76X- $\beta_2$ m variants. (A-T)**  
395 Aggregation kinetics monitored by ThT fluorescence (left) (between 8 to 10 replicates are shown for each  
396 variant); temperature ramp data monitored by far-UV CD at 216 nm (centre) and negative stain EM images  
397 of the twenty D76X- $\beta_2$ m variants taken at the end of the reaction (100 h) (right). The scale bar in black on  
398 the EM images represents 400 nm, while that in blue represents 1  $\mu$ m.  $T_{\text{half}}$  and  $T_{\text{m,app}}$  values are found in  
399 SI Appendix Table S3.

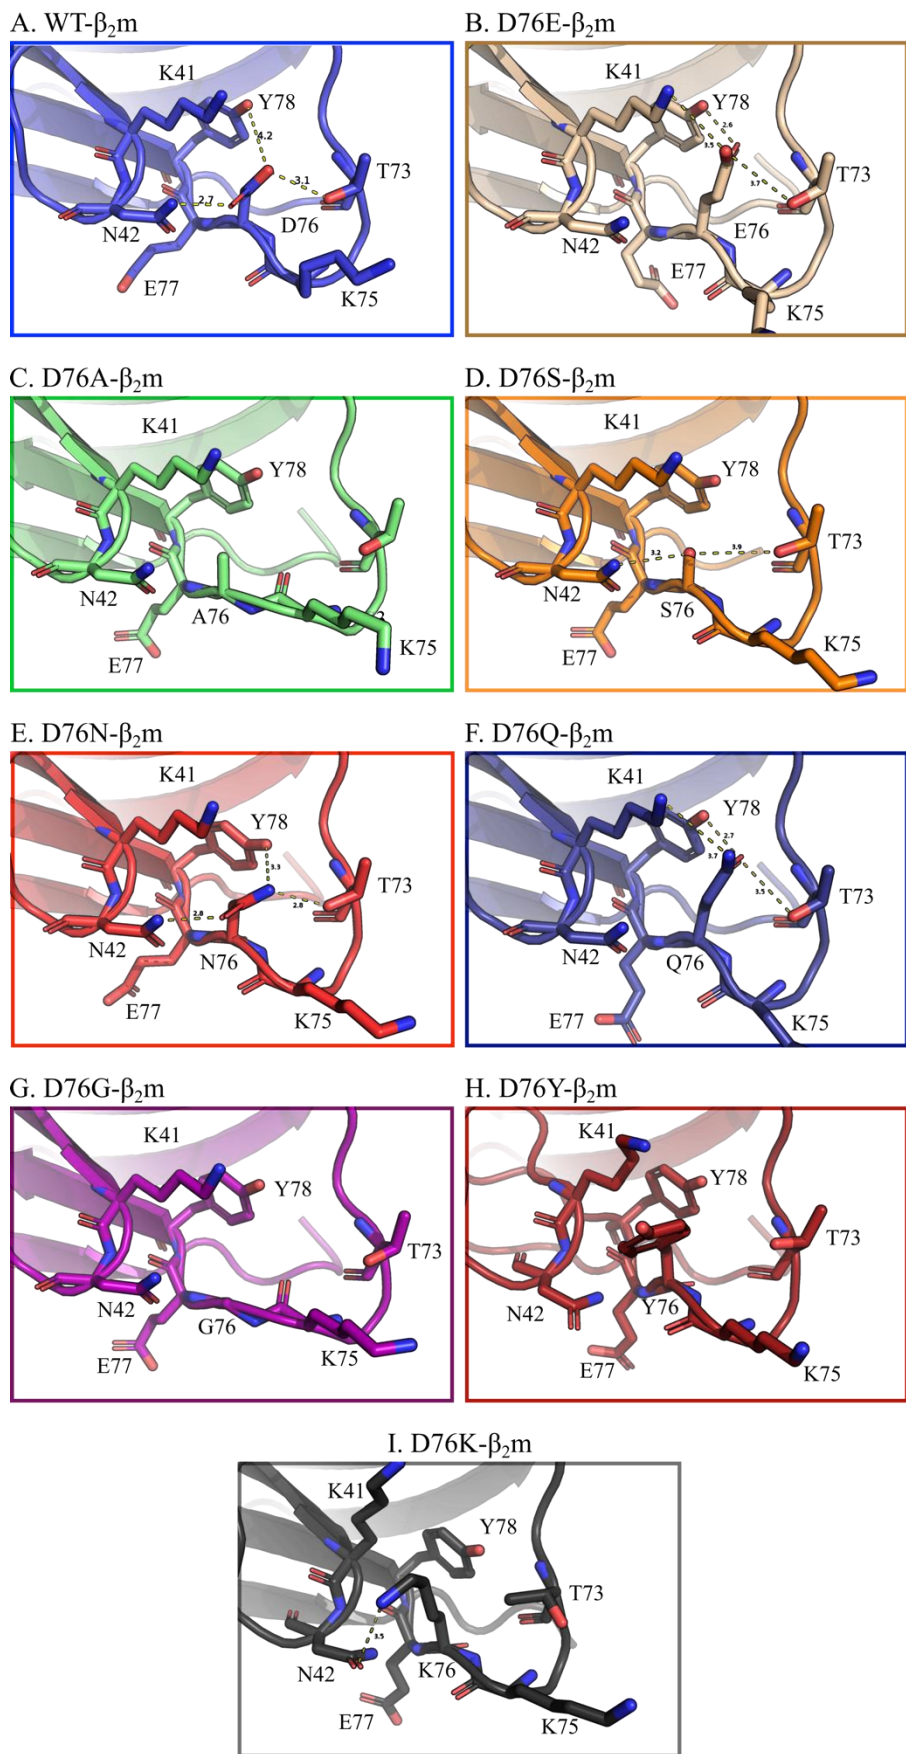

403

404 **Figure S7. Hydrogen bond network at position 76 for the seven D76X- $\beta_2$ m crystal structures.**

405 Cartoon representation of (A) WT- $\beta_2$ m (PDB: 1LDS [6]); (B) D76E- $\beta_2$ m (PDB: 7NMC); (C) D76A- $\beta_2$ m

406 (PDB: 7NMO); (D) D76S- $\beta_2$ m (PDB: 7NMR); (E) D76N- $\beta_2$ m (PDB: 4FXL [23]); (F) D76Q- $\beta_2$ m (PDB:

407 7NMV); (G) D76G- $\beta_2$ m (PDB: 7NMT); (H) D76Y- $\beta_2$ m (PDB: 7NMY); (I) D76K- $\beta_2$ m (PDB: 7NN5). In

408 each case the region shown focuses on residue 76, with sidechains that form hydrogen bonds to residue 76

409 highlighted (N41, K42, T73, K75, E77 and Y78).

410 **SI Appendix Figure 8**

411

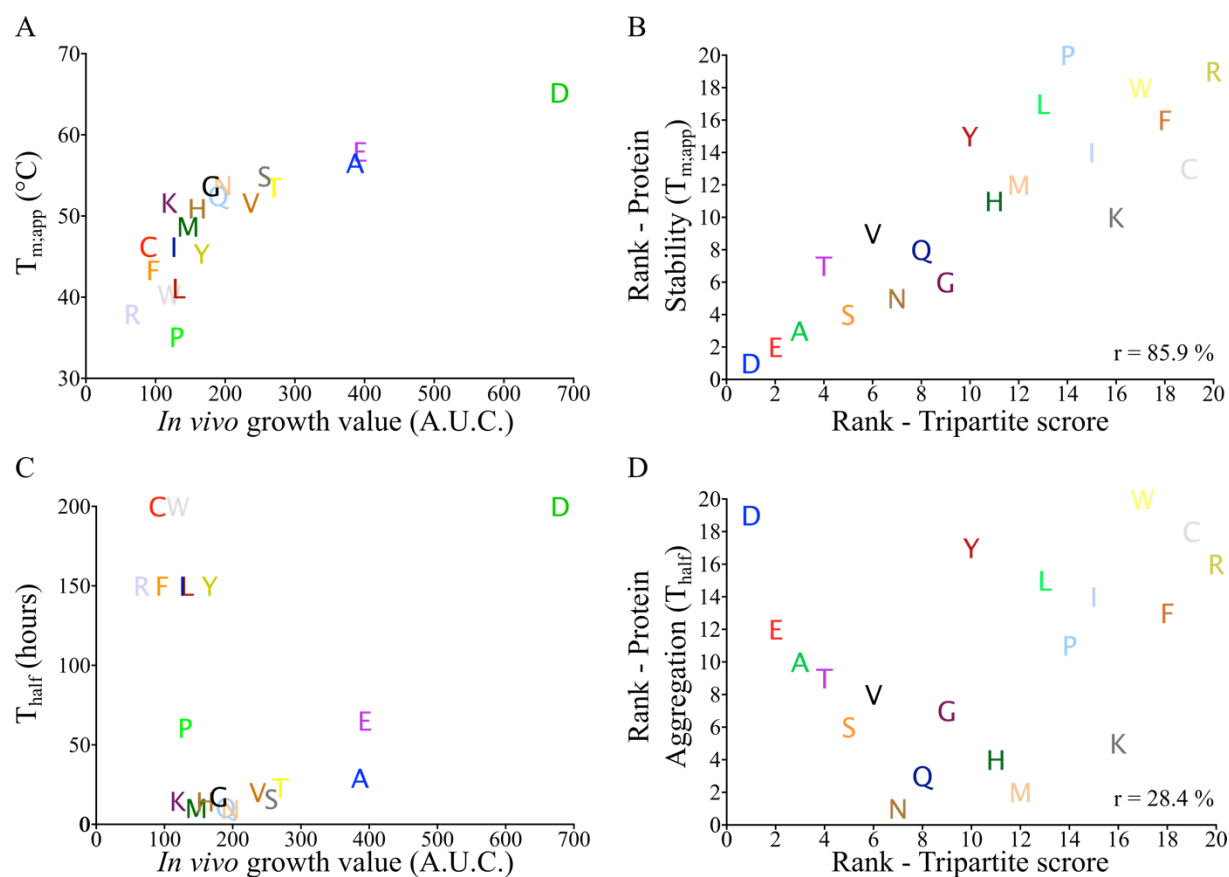

412

413

414 **Figure S8. Correlation between thermodynamic stability/aggregation rate and *in vivo* growth score**

415 **for the twenty D76X-β<sub>2</sub>m variants.** Correlation between protein stability (T<sub>m,app</sub>) (A,B) or protein

416 aggregation (T<sub>half</sub>) (C,D) and the *in vivo* growth score (A.U.C.) (A,C) or rank *in vivo* growth score (B,D)

417 (where 1 represents the best behaving variant (high *in vivo* growth score) and 20 is the lowest score (worst

418 behaving variant)). Each amino acid type is coloured the same in the four plots. "D" corresponds to WT-

419 β<sub>2</sub>m. The r values were calculated using a rank-based Spearman correlation for (B,D).

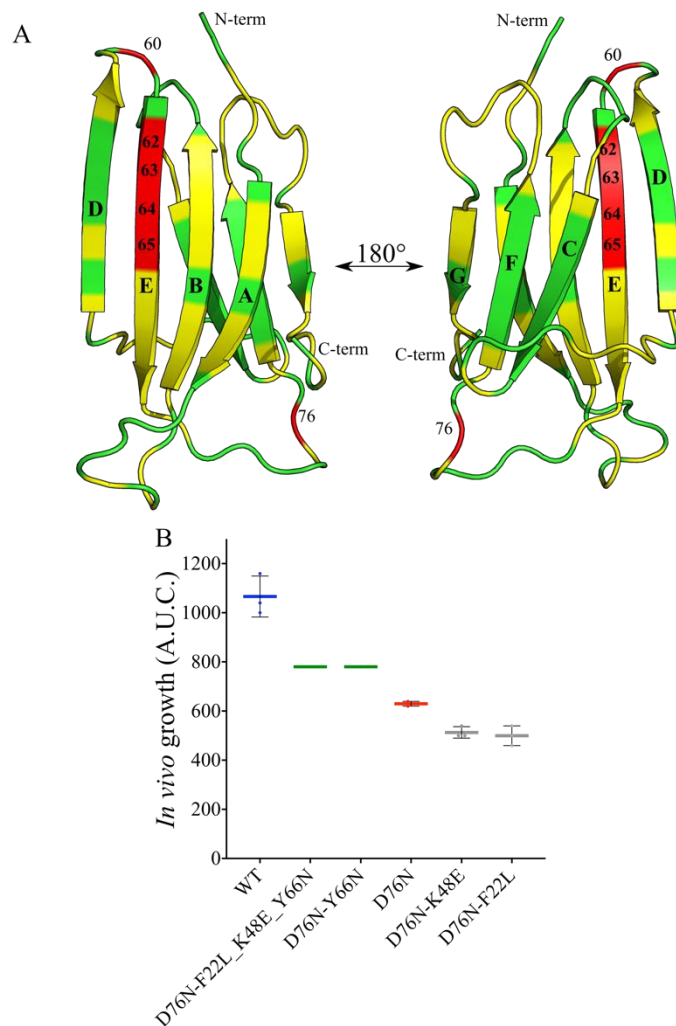

422

423

424 **Figure S9. Residues altered in the D76N-β<sub>2</sub>m\* library that give rise to enhanced antibiotic resistance**425 **in the TPBLA.** Crystal structure of D76N-β<sub>2</sub>m (PDB: 4FXL [23]) highlighting all residues altered after426 random mutagenesis and selection in the TPBLA at 120 or 140 μg mL<sup>-1</sup> ampicillin. Residues substituted

427 most often are in red (&gt; 1σ) (residues 60, 62, 63, 64, 65 and 76), residues changed less often are in yellow

428 (&lt; 1σ) and residues which are not altered are in green. The most frequent mutations involve residues in β-

429 strand E. The results are colour coded according to the frequency of amino acid substitutions using 56

430 unique sequences (see Fig. 5A). (B) *In vivo* growth score (A.U.C.) of Y66N, K48E and F22L in431 combination with D76N-β<sub>2</sub>m either together, or separately. Data represent mean values (n = 3 biologically

432 independent experiments), where each point corresponds to one experiment. The error bars represent one

433 standard deviation, other than for D76N-Y66N\_K48E\_F22L-β<sub>2</sub>m for which n = 1 biological experiments.

434 Note that a larger range of ampicillin concentration was used to determine the behaviour of these improved

435 variants (0 – 280 μg mL<sup>-1</sup> (see SI Appendix Methods)) and hence the A.U.C. is greater than those shown436 for D76N- and WT-β<sub>2</sub>m in Fig. 1D and Fig. 3.

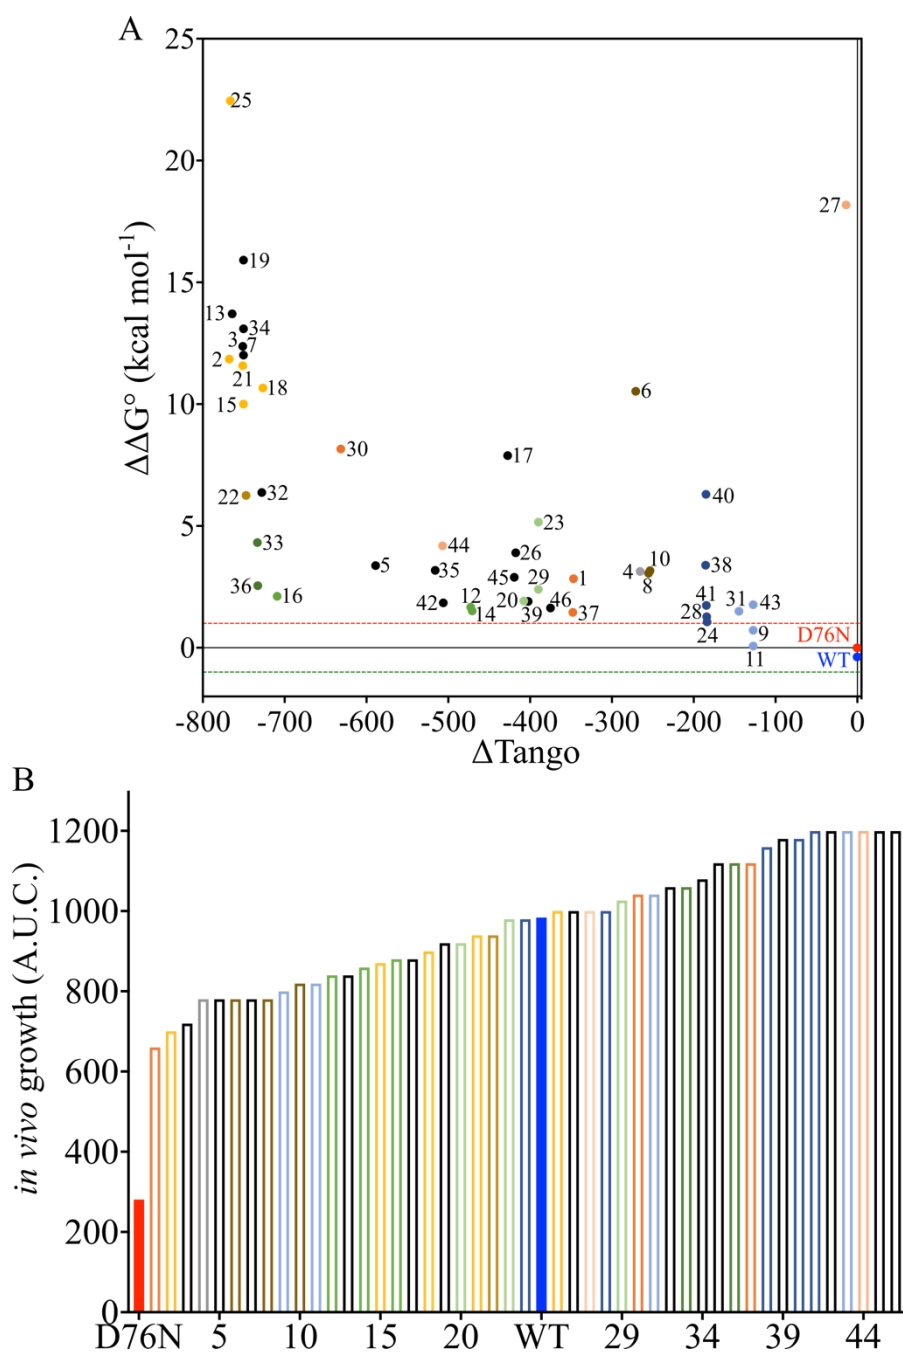441 **Figure S10. Unique sequences obtained during D76N- $\beta_2m$  evolution and selection using the TPBLA.**442 (A) Solubis [24, 25] was used to predict changes in protein aggregation ( $\Delta T_{ango}$ ) and stability ( $\Delta\Delta G^\circ$  kcal443 mol<sup>-1</sup>) of these 46 variants. Each point corresponds to a single sequence (D76N + X). Green line:444 stabilising substitutions ( $\Delta\Delta G^\circ > -1$  kcal mol<sup>-1</sup>), red line: destabilising substitutions ( $\Delta\Delta G^\circ > 1$  kcal mol<sup>-1</sup>).445 (B) *In vivo* growth score of WT- $\beta_2m$ , D76N- $\beta_2m$  and the 46 unique sequences shown in SI Appendix Table

446 S7 (i.e. excluding the 10 sequences that contain a substitution at residue 76). The clones are ranked by

447 their *in vivo* growth score (n = 1 biological experiments). All variants have improved behaviour compared

448 with D76N- $\beta_2$ m and 22 variants have scores that exceed that of WT- $\beta_2$ m (clones 26 to 48). **(A,B)** Colour  
449 code is WT- $\beta_2$ m in dark blue, D76N- $\beta_2$ m is in red, D76N-F22L\_K48E\_Y66N- $\beta_2$ m is in grey, sequences  
450 containing residue 60 mutated are in clear blue, sequences containing residue 62 mutated are in orange,  
451 sequences containing residue 63 mutated are in green, sequences containing residue 64 mutated are in  
452 yellow, sequences containing residue 65 mutated are in brown and sequences with two alterations in the  
453 APR are in black.



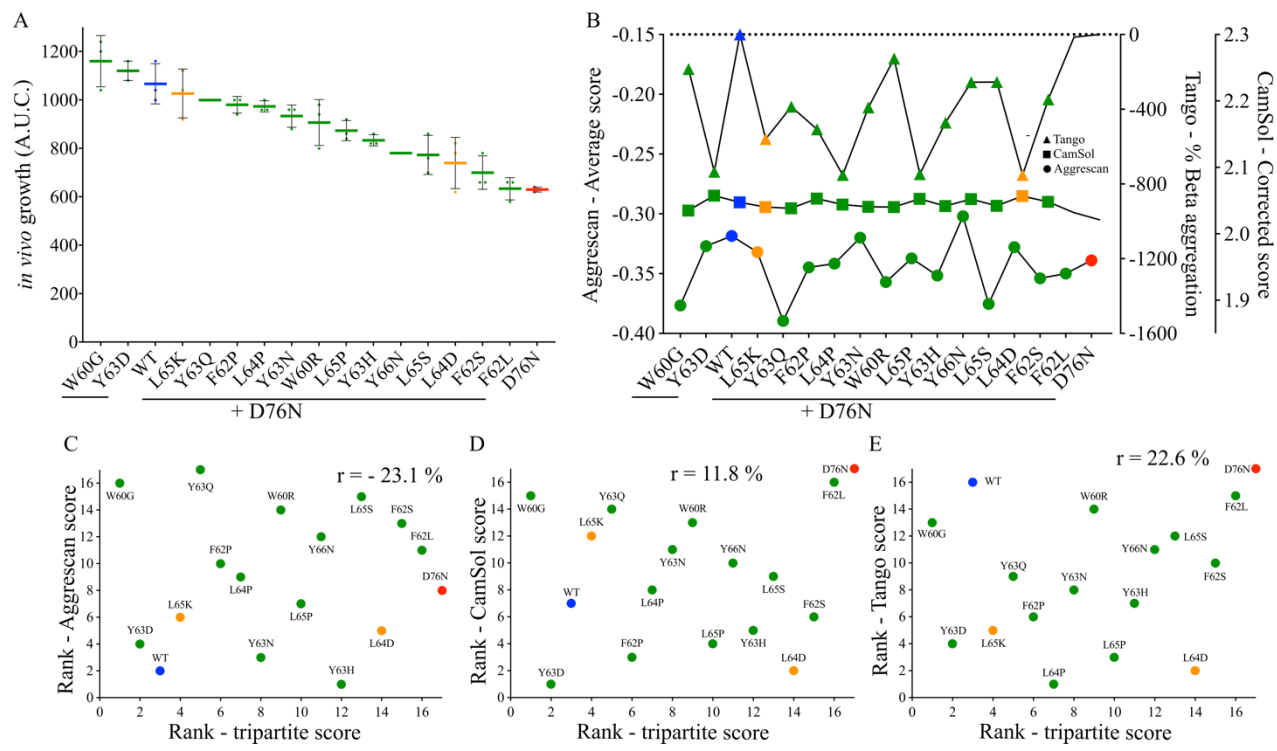

**Figure S11. Prediction of the behaviour of the evolved D76N\_X-β<sub>2</sub>m variants.** (A) *In vivo* growth scores of 15 variants (D76N + X) compared with WT- and D76N-β<sub>2</sub>m. 13 variants were found in the APR (Fig. 5A, in green) and two variants were selected using Solubis (SI Appendix Fig. S12, in orange). Data represent the mean (n = three biologically independent repeats), where each point corresponds to one experiment. The variants are ordered from the highest to the lowest *in vivo* growth score (A.U.C.) (left to right). The error bar represents one standard deviation. The data are reproduced from Fig. 5B for clarity. (B) Aggrescan 3D 2.0 [4, 5], structurally corrected CamSol [3] and sequence-based Tango [8] score for each variant shown in (A). (C,D,E) Correlation between the rank score of Aggrescan2D 2.0 / CamSol / Tango and the rank *in vivo* growth score of the seventeen β<sub>2</sub>m variants (where 1 represents the best behaving β<sub>2</sub>m variants (highest *in vivo* growth score or highest stability and 17 represents the worse behaving β<sub>2</sub>m variants (lowest *in vivo* growth score or lowest stability). The r values were calculated using the rank-based Spearman correlations for (C,D,E).

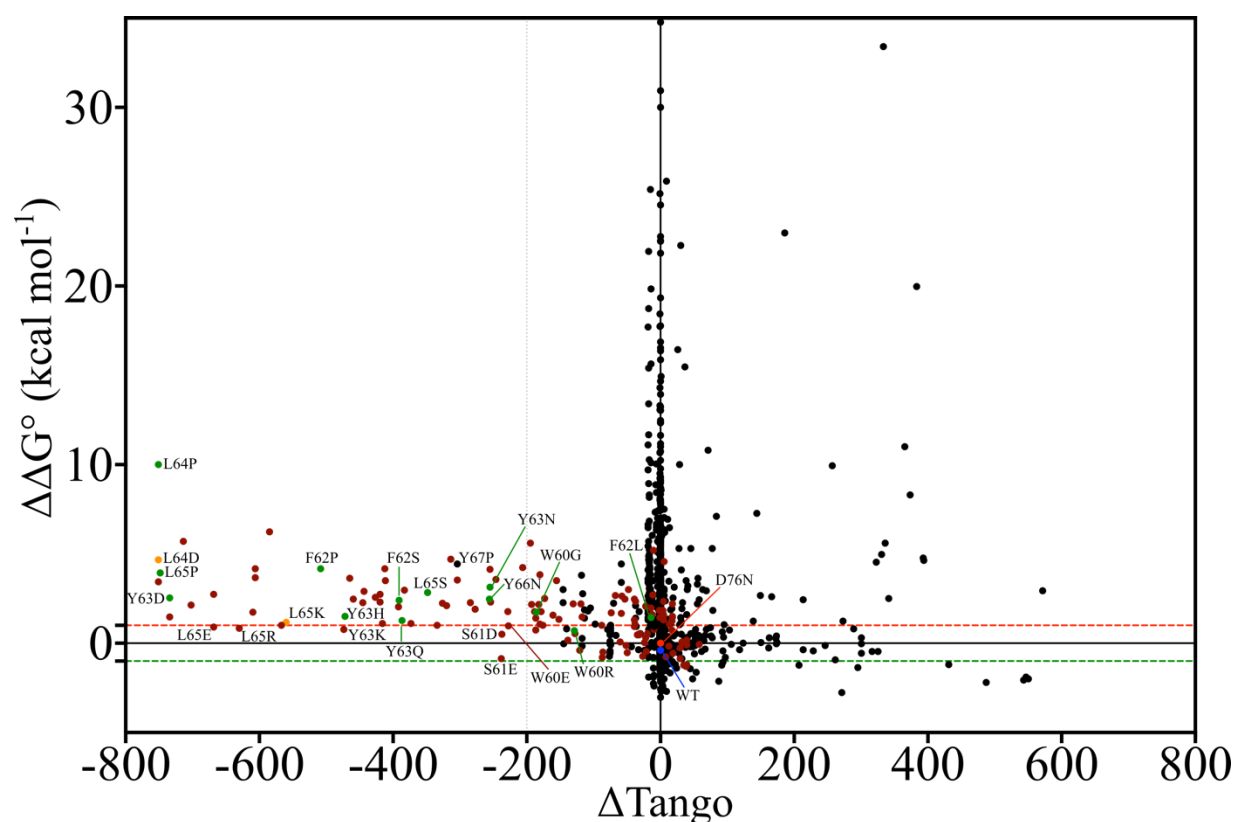

472

473

474 **Figure S12. Saturation mutagenesis of D76N- $\beta_2$ m using Solubis.** Solubis [24, 25] predictions for all  
 475 possible single amino acid substitutions on the aggregation propensity and stability of D76N- $\beta_2$ m, where  
 476 each variant was compared with D76N- $\beta_2$ m. Protein aggregation is predicted using Tango [8] (where  
 477  $\Delta\text{Tango}_{(X)} = \text{Tango score}_{(\text{D76N} + X)} - \text{Tango score}_{(\text{D76N})}$ , where X is a single residue substitution) and protein  
 478 stability is predicted using FoldX [16] (where  $\Delta\Delta G^\circ_{(X)} = \Delta G^\circ_{(\text{D76N} + X)} - \Delta G^\circ_{(\text{D76N})}$ ). Amino acid  
 479 substitutions in the APR (residues 60 to 66) which were not found experimentally are in dark red, those  
 480 found by random mutagenesis and selection in the TPBLA are in green and labelled, those designed using  
 481 Solubis and characterised here (D76N\_L64D- and D76N\_L65K- $\beta_2$ m) are in orange and labelled, D76N-  
 482  $\beta_2$ m is in red and labelled and WT- $\beta_2$ m is in blue and labelled. Six single residue substitutions which  
 483 reduce the aggregation propensity ( $\Delta\text{Tango} < -200$ ) and do not significantly alter that stability of D76N-  
 484  $\beta_2$ m are labelled ( $-1 < \Delta\Delta G^\circ < 1$ , L65E, L65R, Y63K, W60E, S61D and S61E).

485

A. D76N\_F62P- $\beta_2m$

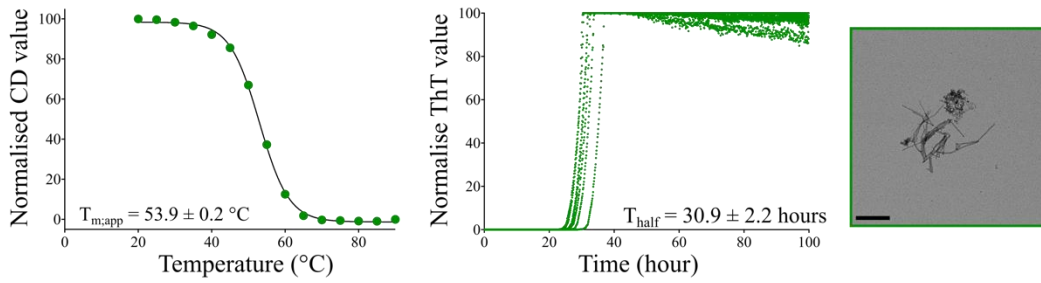

B. D76N\_Y63D- $\beta_2m$

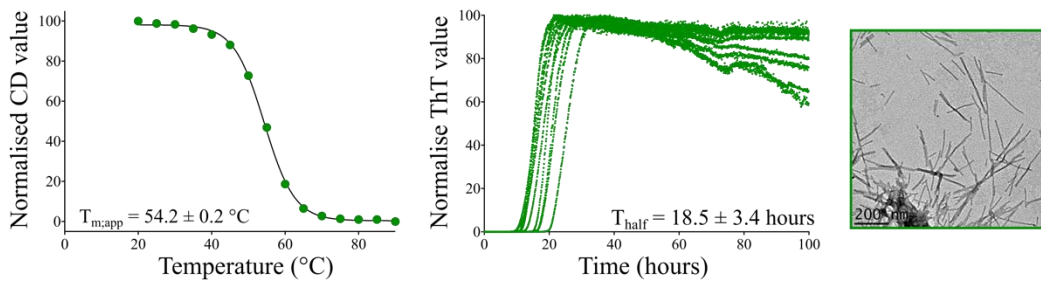

C. D76N\_L64D- $\beta_2m$

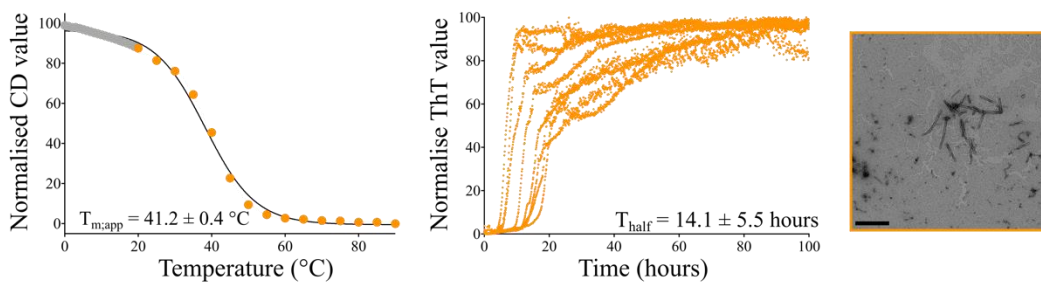

D. D76N\_L65K- $\beta_2m$

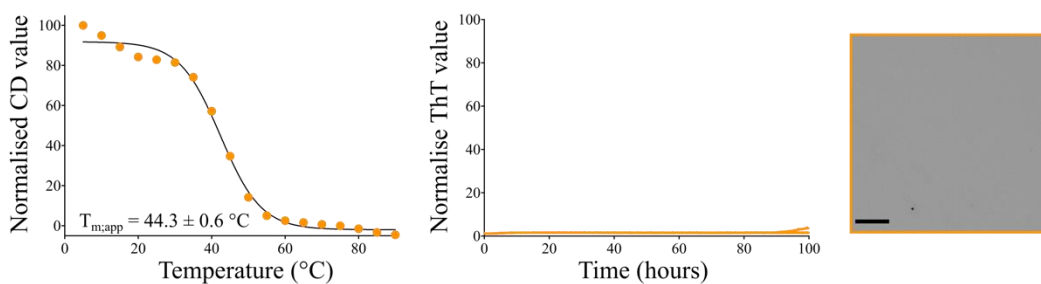

E. D76N\_L64P- $\beta_2m$

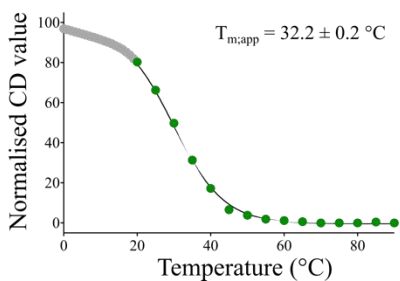

F. D76N\_L65P- $\beta_2m$

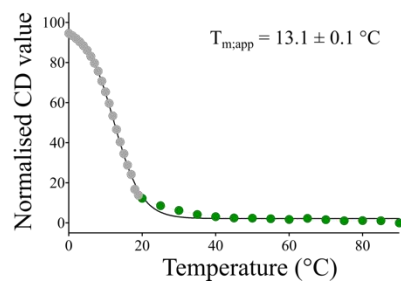

490 **Figure S13. Characterisation of different D76N\_X- $\beta_2$ m variants.** (A-D) Thermal denaturation  
491 monitored by far-UV CD at 216 nm (left), ThT fluorescence monitoring amyloid formation for different  
492 variants, as indicated (8-10 replicates are shown) (centre) and negative stain EM micrographs of the  
493 endpoint from each reaction (right). Scale bar = 200 nm. (E-F) Thermal denaturation monitored by far-UV  
494 CD at 216 nm of (E) D76N\_L64P- and (F) D76N\_L65P- $\beta_2$ m. In (C,E,F), the variants were too unstable to  
495 fit the curves independently, we used as a reference the normalised value from the pre-transition baseline  
496 of D76N- $\beta_2$ m (SI Appendix Fig. S6L) (shown as grey dots). The curves were fitted using CDpal [2].  
497 Values of the  $T_{m,app}$  and  $T_{half}$  are shown in each plot.

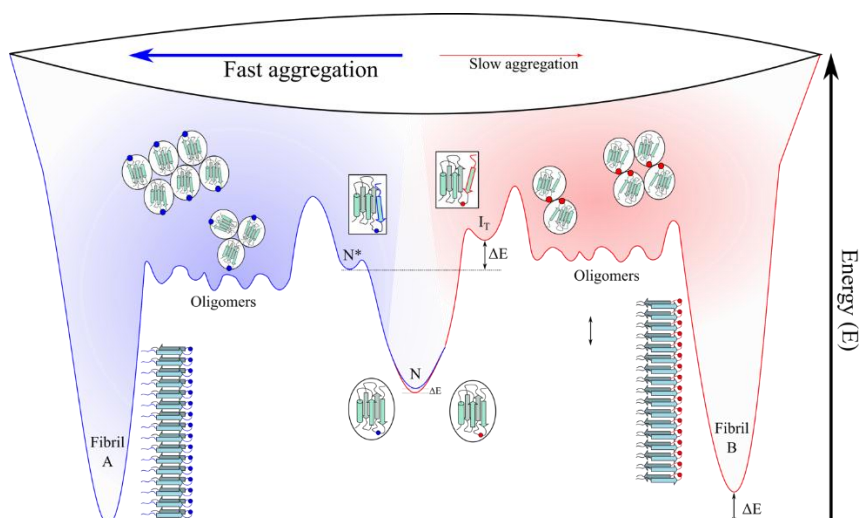499  
500

501 **Figure S14. Schematic illustration of the energy landscape of aggregation showing how sequence**  
 502 **changes can alter the rate and/or products of aggregation.** The red and the blue dots depict different  
 503 amino acid substitutions which do not affect the native structure (N), but can change the rate of  
 504 aggregation, the mechanism of aggregation (different intermediates and/or oligomers are formed), and/or  
 505 the products of aggregation (different fibril structures result). This complex energy landscape highlights  
 506 the need to analyse all species formed on the reaction coordinate in order to understand, and predict, how  
 507 changes in the sequence (resulting from familial mutation, truncation, or other post-translational  
 508 modification(s)) and/or changes in the solution or cellular conditions affect amyloid formation. For WT-  
 509  $\beta_2m$  and D76N- $\beta_2m$ , represented here by the red and blue dots, respectively, aggregation proceeds  
 510 slowly/rapidly via formation of the non-native, but partially structured  $I_T$  or  $N^*$  species, that are necessary  
 511 precursors of their aggregation. How the mutation of Asp76 to Asn alters the mass and structure of  
 512 oligomers formed and/or the structure of the fibril products remains to be resolved.

513  
514  
515  
516

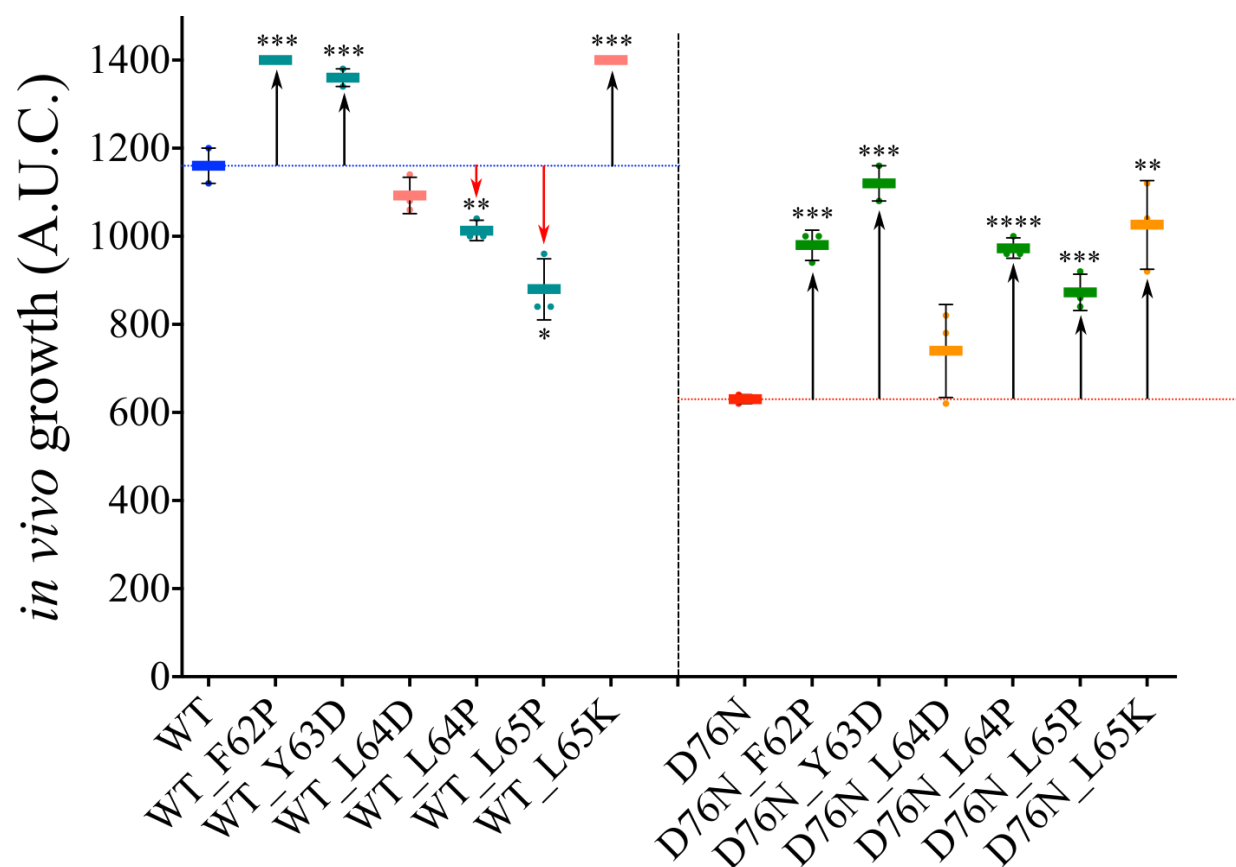521 **Figure S15 Comparison of the effect of single point substitutions in the APR for WT- and D76N- $\beta_2$ m.**

522 *In vivo* growth score for different sequence alterations in the APR of WT- $\beta_2$ m and D76N- $\beta_2$ m determined  
 523 using the TPBLA. The error bars represent one standard deviation (n = 3 biologically independent repeats),  
 524 where each point corresponds to one experiment. The error bars represent one standard deviation.  
 525 Asterisks denote significance compared with WT- (left) or D76N- $\beta_2$ m (right). \* corresponds to p = 0.03,  
 526 \*\* corresponds to p = 0.02, \*\* 0.009 > p > 0.002 and \*\*\*\* p = 0.0007 (t-Test: Paired Two Sample for  
 527 Means, two-tail). The blue dotted line corresponds to the mean A.U.C. of WT- $\beta_2$ m. The red dotted line  
 528 corresponds to the mean A.U.C. of D76N- $\beta_2$ m. The black arrows show an increase of in A.U.C., while the  
 529 red arrows show a decrease in A.U.C. Note that a larger range of ampicillin concentration was used to  
 530 determine the behaviour of these improved variants (0 – 280  $\mu\text{g mL}^{-1}$  (see SI Appendix Methods)) and  
 531 hence the A.U.C is greater than those shown for D76N- and WT- $\beta_2$ m in main text Fig. 1D and Fig. 3.

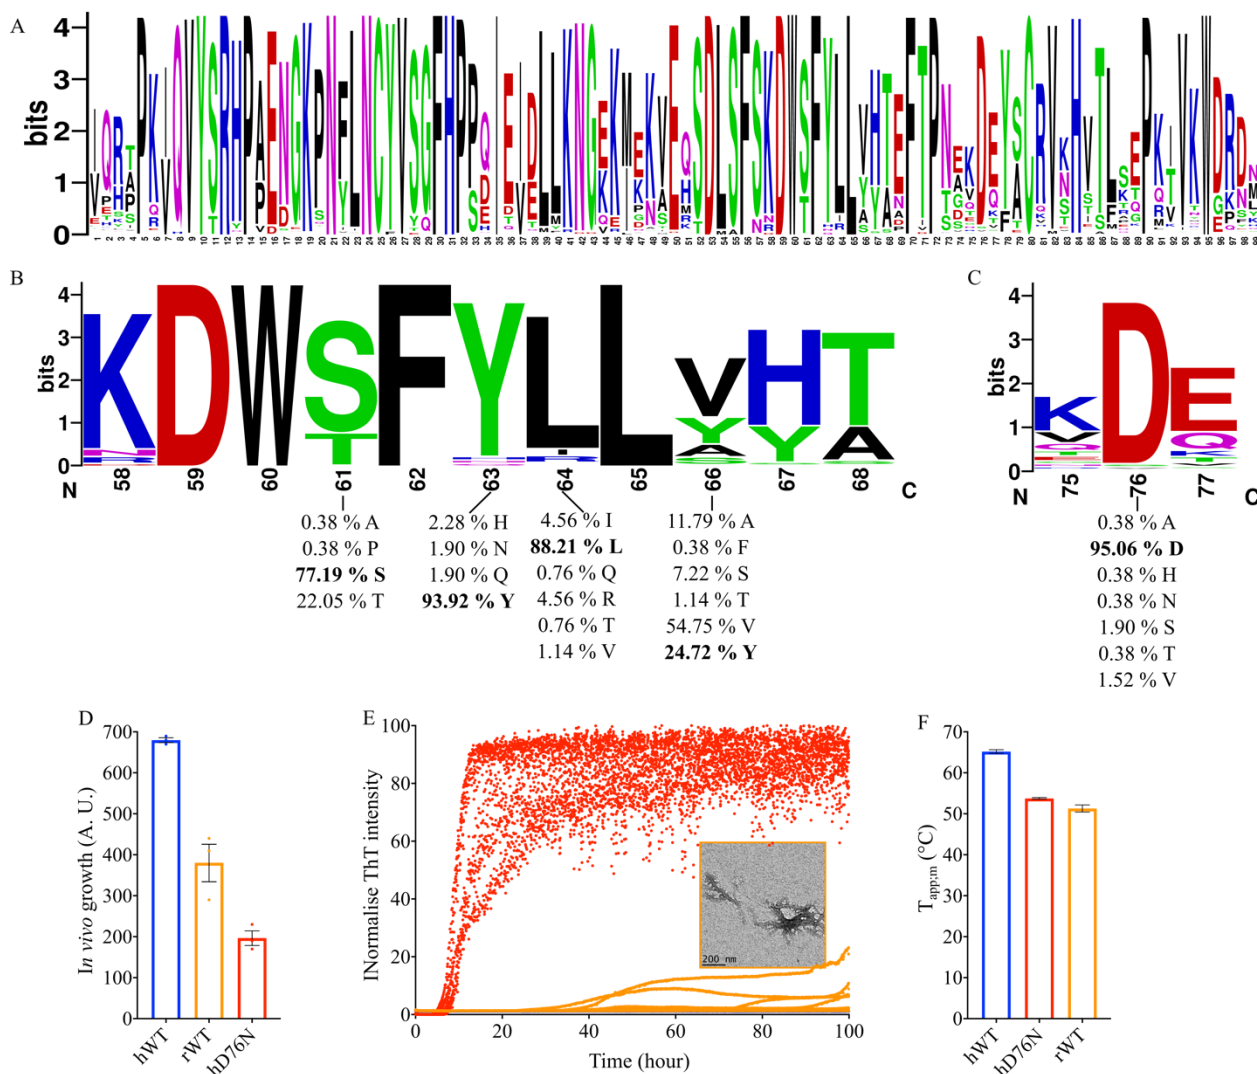

534

535

536 **Figure S16. Natural evolution of  $\beta_2m$  sequences.** (A) Consensus sequence of 262  $\beta_2m$  sequences from  
 537 Mammalia determined using WebLogo [26]. (B) Zoom on the sequence that contains the APR (residues 60  
 538 to 66) and (C) on the sequence spanning residues 75 to 77. (D) *In vivo* growth score of rabbit  $\beta_2m$  (rWT),  
 539 compared with human WT- $\beta_2m$  (hWT) and human D76N- $\beta_2m$  (hD76N). The error bars (black) represent  
 540 one standard deviation ( $n = 3$  biological repeats, where each point corresponds to one experiment). (E)  
 541 Aggregation kinetics measured using ThT fluorescence (8-10 replicates are shown). Human WT- $\beta_2m$   
 542 (blue), rabbit  $\beta_2m$  (orange) and human D76N- $\beta_2m$  (red). A negative stain EM image of rabbit  $\beta_2m$  taken  
 543 after 100 h incubation is shown inset (fibril yield was 18.5 % compared with 97.5 % for D76N- $\beta_2m$ ) (scale  
 544 bar = 200 nm). (F) Thermal stability of human WT- $\beta_2m$  (hWT, blue), rabbit- $\beta_2m$  (rWT, orange) and  
 545 human D76N- $\beta_2m$  (hD76N, red) measured using temperature ramp by far-UV CD at 216 nm. Error bars  
 546 show the fitting error.

547 **REFERENCES**

- 548 1. Karamanos, T.K., et al., *Structural mapping of oligomeric intermediates in an amyloid assembly*  
549 *pathway*. Elife, 2019. **8**: 46574.
- 550 2. Niklasson, M., et al., *Robust and convenient analysis of protein thermal and chemical stability*.  
551 Protein Sci, 2015. **24**: 2055-2062.
- 552 3. Sormanni, P., F.A. Aprile, and M. Vendruscolo, *The CamSol method of rational design of protein*  
553 *mutants with enhanced solubility*. J Mol Biol, 2015. **427**: 478-490.
- 554 4. Zambrano, R., et al., *AGGRESKAN3D (A3D): server for prediction of aggregation properties of*  
555 *protein structures*. Nucleic Acids Res, 2015. **43**(W1): W306-313.
- 556 5. Kuriata, A., et al., *Aggrescan3D (A3D) 2.0: prediction and engineering of protein solubility*.  
557 Nucleic Acids Res, 2019. **47**(W1): W300-W307.
- 558 6. Trinh, C.H., et al., *Crystal structure of monomeric human beta-2-microglobulin reveals clues to its*  
559 *amyloidogenic properties*. Proc Natl Acad Sci U S A, 2002. **99**: 9771-9776.
- 560 7. Valleix, S., et al., *Hereditary systemic amyloidosis due to Asp76Asn variant beta2-microglobulin*.  
561 N Engl J Med, 2012. **366**: 2276-2283.
- 562 8. Linding, R., et al., *A comparative study of the relationship between protein structure and beta-*  
563 *aggregation in globular and intrinsically disordered proteins*. J Mol Biol, 2004. **342**: 345-353.
- 564 9. Fujiwara, K., H. Toda, and M. Ikeguchi, *Dependence of alpha-helical and beta-sheet amino acid*  
565 *propensities on the overall protein fold type*. BMC Struct Biol, 2012. **12**: 18.
- 566 10. Kabsch, W., *Xds*. Acta Crystallogr D Biol Crystallogr, 2010. **66**: 125-132.
- 567 11. Evans, P., *Scaling and assessment of data quality*. Acta Crystallogr D Biol Crystallogr, 2006. **62**:  
568 72-82.
- 569 12. McCoy, A.J., et al., *Phaser crystallographic software*. J Appl Crystallogr, 2007. **40**: 658-674.
- 570 13. Iwata, K., et al., *High-resolution crystal structure of beta2-microglobulin formed at pH 7.0*. J  
571 Biochem, 2007. **142**: 413-419.
- 572 14. Murshudov, G.N., et al., *REFMAC5 for the refinement of macromolecular crystal structures*. Acta  
573 Crystallogr D Biol Crystallogr, 2011. **67**: 355-367.
- 574 15. Emsley, P., et al., *Features and development of Coot*. Acta Crystallogr D Biol Crystallogr, 2010.  
575 **66**: 486-501.
- 576 16. Van Durme, J., et al., *A graphical interface for the FoldX forcefield*. Bioinformatics, 2011. **27**:  
577 1711-1712.
- 578 17. Hou, Q., et al., *SOLart: a structure-based method to predict protein solubility and aggregation*.  
579 Bioinformatics, 2020. **36**: 1445-1452.
- 580 18. Hou, Q., et al., *Computational analysis of the amino acid interactions that promote or decrease*  
581 *protein solubility*. Sci Rep, 2018. **8**: 14661.
- 582 19. Zibae, S., et al., *A simple algorithm locates beta-strands in the amyloid fibril core of alpha-*  
583 *synuclein, Abeta, and tau using the amino acid sequence alone*. Protein Sci, 2007. **16**: 906-918.



- 584 20. Walsh, I., et al., *PASTA 2.0: an improved server for protein aggregation prediction*. Nucleic Acids  
585 Res, 2014. **42**(Web Server issue): W301-307.
- 586 21. Pandurangan, A.P., et al., *SDM: a server for predicting effects of mutations on protein stability*.  
587 Nucleic Acids Res, 2017. **45**(W1): W229-W235.
- 588 22. Eichner, T., et al., *Conformational conversion during amyloid formation at atomic resolution*. Mol  
589 Cell, 2011. **41**: 161-172.
- 590 23. de Rosa, M., et al., *Decoding the structural bases of D76N beta2-microglobulin high*  
591 *amyloidogenicity through crystallography and asn-scan mutagenesis*. PLoS One, 2015. **10**:  
592 e0144061.
- 593 24. Van Durme, J., et al., *Solubis: a webservice to reduce protein aggregation through mutation*.  
594 Protein Eng Des Sel, 2016. **29**: 285-289.
- 595 25. van der Kant, R., et al., *SolubiS: Optimizing Protein Solubility by Minimal Point Mutations*.  
596 Methods Mol Biol, 2019. **1873**: 317-333.
- 597 26. Crooks, G.E., et al., *WebLogo: a sequence logo generator*. Genome Res, 2004. **14**: 1188-1190.  
598
